# Supplementary material for: Kinetics of the LOV domain of ZEITLUPE determine its circadian function in Arabidopsis
Source: eLife journal article supplement (doi:10.7554/elife.21646), 2017-02-28
Supplement: supp [file elife_poa_e21646_Figure_1_figure_supplement_1.pdf › elife_poa_e21646_Figure_1_figure_supplement_1.pdf]

**A**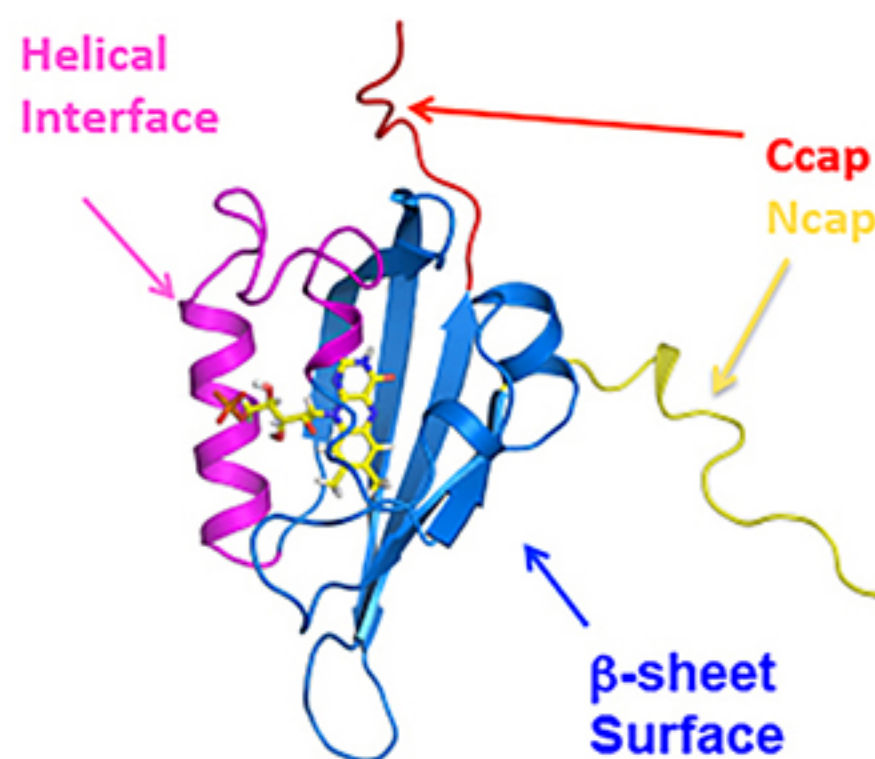**B**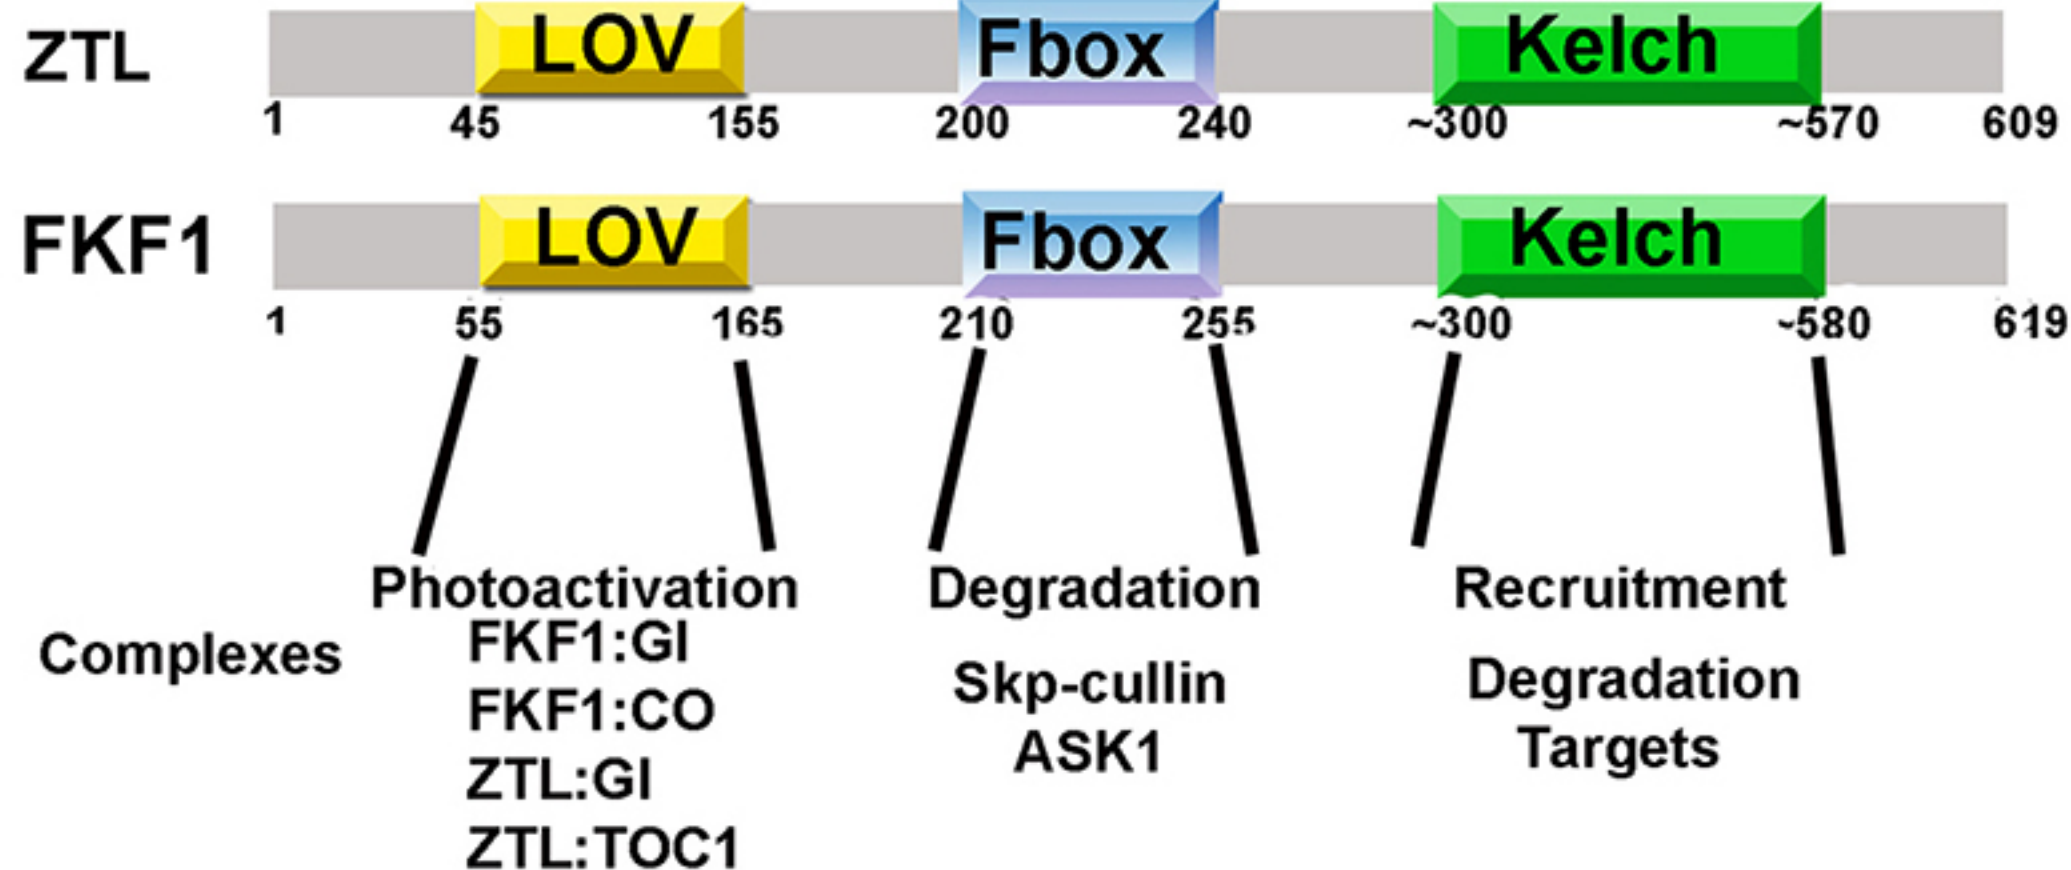**C**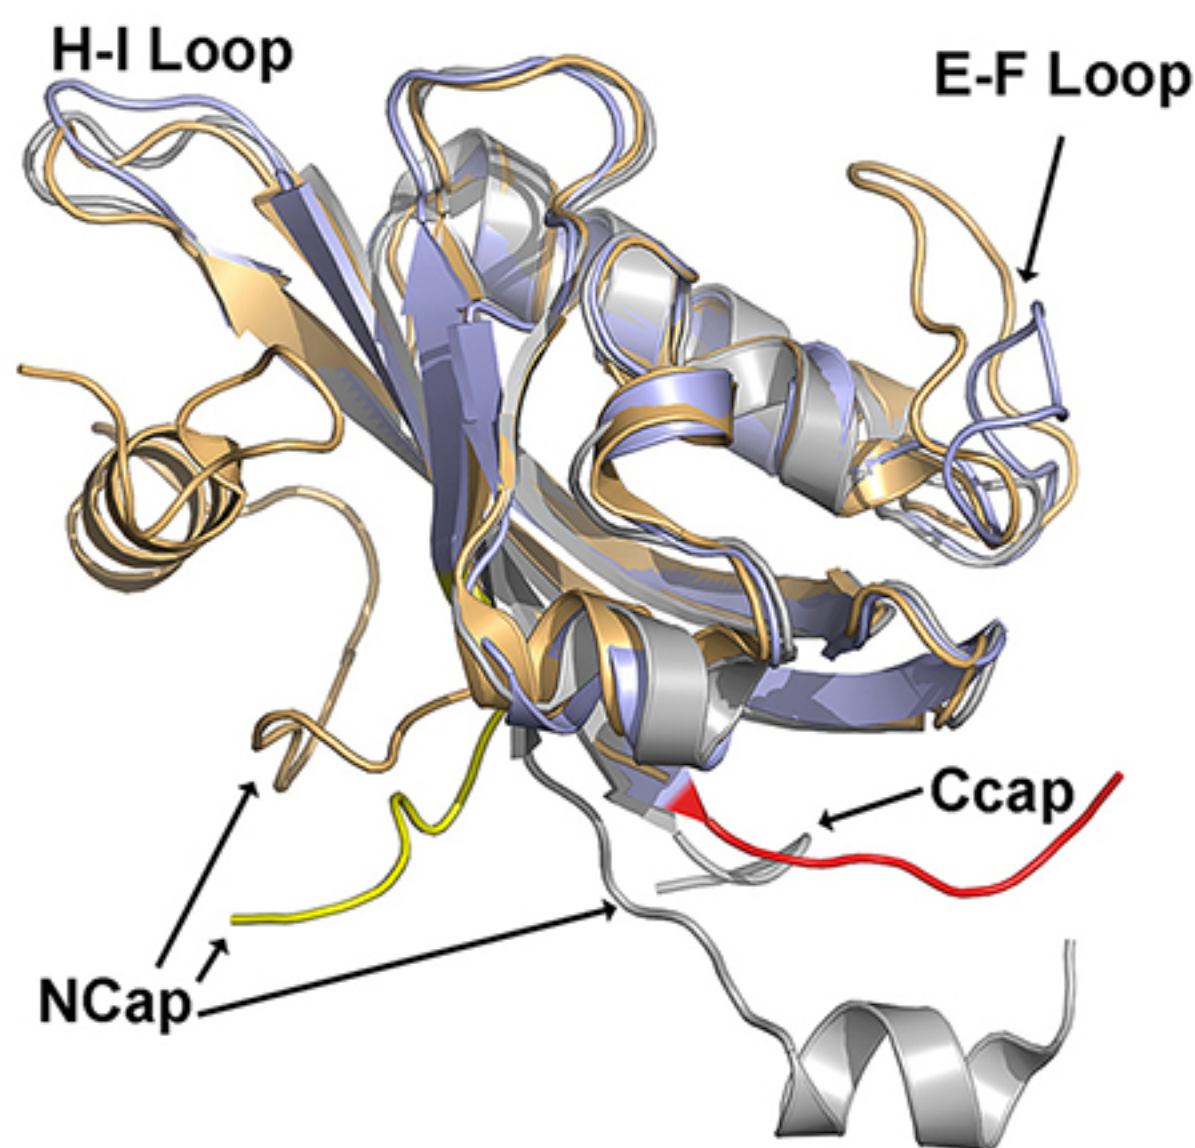**D**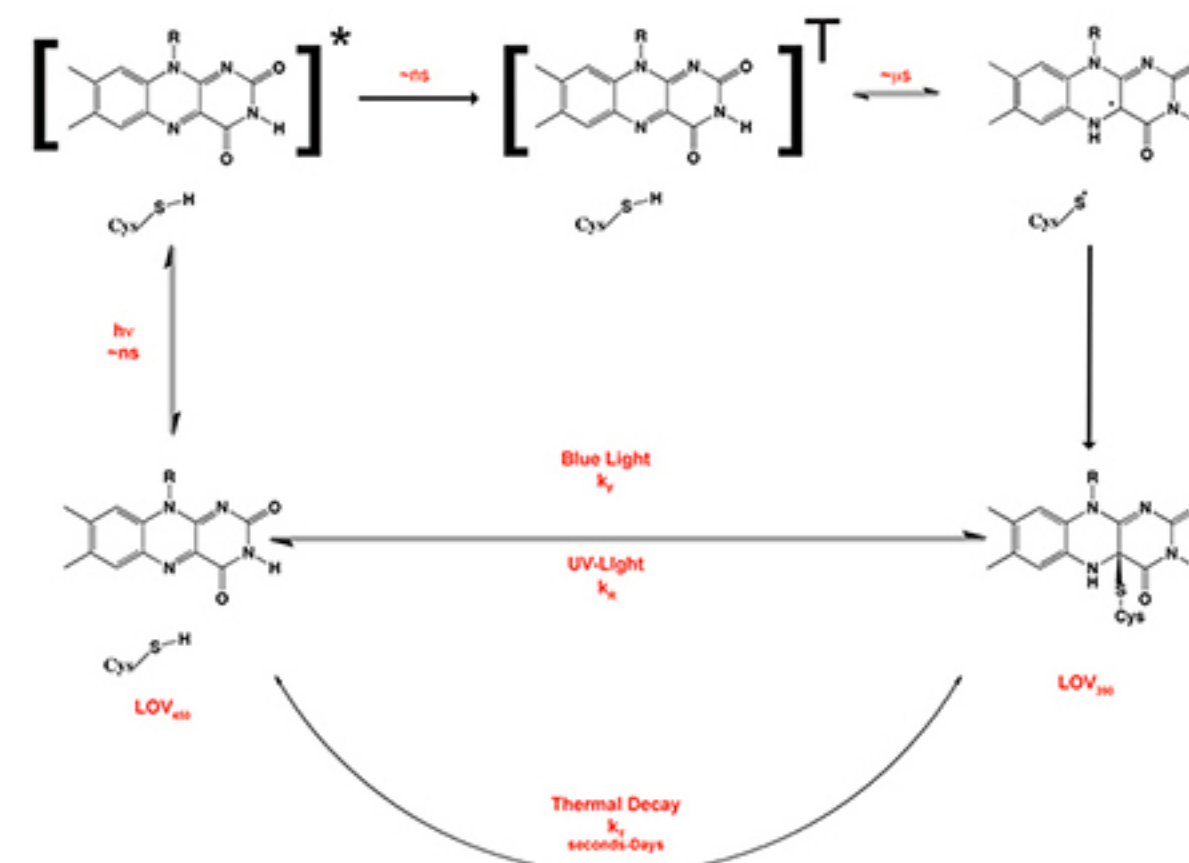**E****N-terminal Cap**

|      |    |                           |                               |    |
|------|----|---------------------------|-------------------------------|----|
| ZTL  | 29 | GGPIYPVGNLLH-TAPCGFVVTD   | AVEPDQPIIYVNTVFEMVTGYRAEEVL   | 78 |
| LKP2 | 29 | NGAIPFPVGS LPG-TAPCGFVVSD | ALEPDNPIIYVNTVFEIVTGYRAEEVI   | 78 |
| FKF1 | 37 | DEKLPLEVGMFYYPMTPPSFIVSD  | ALEPDFPLIYVNRVFEVFTGYRADEVL   | 87 |
|      |    | * **                      | * ^ ^ * * * * * * * * * * * * |    |

|      |    |                 |                        |                                |     |
|------|----|-----------------|------------------------|--------------------------------|-----|
| ZTL  | 79 | GGNCRFLQCRGPF   | AKRRHPLVDSMVVSEIRKCID  | EGIEFQGE LLNFRKDGS             | 129 |
| LKP2 | 79 | GRNCRFLQCRGPF   | TKRRHPLVDS             | STIVAKMRQCLENGIEFQGE LLNFRKDGS | 129 |
| FKF1 | 88 | GRNCRFLQYRD     | PRAQRHPLVDPVVVSEIRRCLE | EGIEFQGE LLNFRKDGT             | 138 |
|      |    | * ^ * * * * * * | * * * * *              | * * * * * * * * * * * * * *    |     |

**C-terminal Cap**

|      |     |              |                   |                 |        |
|------|-----|--------------|-------------------|-----------------|--------|
| ZTL  | 130 | PLMNRLRLTPIY | GDDDTITHIIGIQFFI  | ETDIDLGPVLGSST  | 171    |
| LKP2 | 130 | PLMNKLRLVPIR | -EEDEITHFIGVLLFT  | DAKIDLGPSPDL    | SA 170 |
| FKF1 | 139 | PLVNRLRLAPI  | RDDDG TITHVIGIQVF | SETTIDLDRVSYPVF | 180    |
|      |     | ** * * * *   | * * * *           | * * * *         |        |
