# Supplementary material for: Kinetics of the LOV domain of ZEITLUPE determine its circadian function in Arabidopsis
Source: eLife journal article supplement (doi:10.7554/elife.21646), 2017-02-28
Supplement: supp [file elife_poa_e21646_Figure_7_figure_supplement_1.pdf › elife_poa_e21646_Figure_7_figure_supplement_1.pdf]

|                                                                                                   |     |                                                                        |                                                    |     |
|---------------------------------------------------------------------------------------------------|-----|------------------------------------------------------------------------|----------------------------------------------------|-----|
| AtZTL                                                                                             | 44  | PCG <b>F</b> VVTDAVEPDQPIIYVNTVFEMVTGYRAEEVL                           | GGNCRFLQCRGPFAKRRHPLVDS                            | 101 |
| AtLKP2                                                                                            | 40  | PCG <b>F</b> VVSDALEPDNPPIIYVNTVFEIVTGYRAEEVI                          | GRNCRFLQCRGPFTKRRHPMVDS                            | 91  |
| GmZTL                                                                                             | 44  | PCG <b>F</b> VVTDALDPDHPIIYVNTVFEIVTGYCAEDVL                           | GRNCRFLQCRGPFAKRRHPLVDS                            | 101 |
| OsZTL1                                                                                            | 57  | PC <b>G</b> L <b>V</b> VTDALEPDCPIIYVNCGFEEATGYRAEEVL                  | GRNCRFLQCRGPFAQRRHPLVDA                            | 114 |
| OsZTL2                                                                                            | 53  | AC <b>G</b> L <b>V</b> VTDALEPDPFPIIYVNRGFEDATGYRAEEVL                 | GRNCRFLQCRGPFAKRRHPLVDT                            | 110 |
| CsZTL                                                                                             | 38  | PCG <b>F</b> VVTD <b>S</b> LEPDHPIIYVNTVFEMVTGYRAEEVL                  | GRNCRFLQCRGPFAKRRHPLVDS                            | 95  |
| CcZTL                                                                                             | 45  | PCG <b>F</b> VVTDAL <b>E</b> PDHPIIYVNSVFESITGYRAEDVL                  | GRNCRFLQCRGPFAKRRHPLVDS                            | 102 |
| GhZTL                                                                                             | 37  | PCG <b>F</b> VVTDAL <b>E</b> SDHPIIYVNTVFEMVTGYRAEEVL                  | GRNCRFLQCRGPFAKRRHPLVDS                            | 94  |
| ZmZTL1                                                                                            | 56  | PC <b>G</b> L <b>V</b> VTDALEPDCPIIYVNRGFEEATGYRAEEVL                  | GRNCRFLQCRGPFAARRHPLVDA                            | 113 |
| ZmZTL2                                                                                            | 39  | AC <b>G</b> M <b>V</b> VTDALEPDPFPIIYVNRGFESSTGYSAAEVL                 | GRNCRFLQCRGPFAQRRHPLVDA                            | 96  |
| BdZTL2                                                                                            | 46  | AC <b>G</b> L <b>V</b> VTDALEPDPFPIIYVNRGFEDATGYHAAEVL                 | GRNCRFLQCRGPFAQRRHPLVDA                            | 103 |
| BdZTL1                                                                                            | 87  | PY <b>G</b> L <b>V</b> VTDALEPDCPIIYVNRGFEEATGYRAEEVL                  | GRNCRFLQCRGPFAQRRHPLVDA                            | 145 |
| SiZTL1                                                                                            | 58  | PC <b>G</b> L <b>V</b> VTDALEPDCPIIYVNRGFEDATGYRAEEVL                  | GRNCRFLQCRGPFAQRRHPLVDA                            | 115 |
| SiZTL2                                                                                            | 46  | AC <b>G</b> M <b>V</b> VTDALEPDPFPIIYVNRGFEDATGYRAEEVL                 | GRNCRFLQCRGPFAQRRHPLVDT                            | 103 |
| Bra038832                                                                                         | 37  | TF <b>G</b> F <b>V</b> VTDALDPDHPIIYVNTVFEIITGYRADEVI                  | GK <b>N</b> CRFLQCRGPYAKRRHPSVDS                   | 94  |
| Bra038831                                                                                         | 40  | PCG <b>F</b> VVSDALEPDQPIIYVNAVFEIVTGYRAEEVI                           | GRNCRFLQCRGPYAKRRHPSVDS                            | 97  |
| Bra038830                                                                                         | 40  | PCG <b>F</b> VVSDALEPDQPIIYVNTVFEIVTGYRAEEVI                           | GRNCRFLQCRGPYAKRRHPSVDS                            | 97  |
| MpFKF1                                                                                            | 60  | PC <b>G</b> L <b>I</b> VTDAL <b>E</b> PDQPIIYVNTVFEFITGYKAAEIL         | GK <b>N</b> CRFLQCRGPFAQRRHPLVDP                   | 117 |
| SmFKF1                                                                                            | 4   | PC <b>S</b> V <b>V</b> VTDALDVDFPIIYVNNIFEFITGYKAAEVL                  | GRNCRFLQ <b>F</b> RGPFAQRRHPLVDS                   | 61  |
| AtFKF1                                                                                            | 52  | PP <b>S</b> F <b>I</b> VSDALEPDPFPLIYVNRVFEVFTGYRADEVL                 | GRNCRFLQ <b>Y</b> RD <b>P</b> RAQRRHPLVDP          | 109 |
| GmFKF1                                                                                            | 48  | PT <b>S</b> F <b>V</b> VTDALEPDPFPIIYVNKVFEISTGYRADEAL                 | GRNCRFLQ <b>Y</b> RD <b>P</b> RAQRRHPLVDP          | 105 |
| OsFKF1                                                                                            | 64  | AA <b>A</b> I <b>V</b> VTDAVEVD <b>F</b> PVIYVNAAFEAATGYRADEVL         | GRNCRFLQ <b>F</b> RD <b>P</b> RAQRRHPLVDP          | 121 |
| CsFKF1                                                                                            | 57  | PT <b>S</b> F <b>V</b> VTDALEPDPFPIIYVNKVFEIFTGYRADEVL                 | G <b>Q</b> NCRFLQ <b>Y</b> RD <b>P</b> RAQRRHPLVDP | 114 |
| CcFKF1                                                                                            | 72  | PT <b>S</b> F <b>V</b> VADAFDPDPFPIIYVNKVFEIFTGYRADEVL                 | GRNCRFLQ <b>Y</b> RD <b>P</b> RAQRRHPLVDP          | 129 |
| GhFKF1                                                                                            | 55  | PT <b>S</b> F <b>V</b> VTDALEPDPF <b>P</b> VIYVNKVFEVFTGYRADEVL        | GRNCRFLQ <b>Y</b> RD <b>R</b> RAQRRHPLVDP          | 112 |
| ZmFKF1                                                                                            | 42  | PA <b>A</b> I <b>L</b> VADAAEVD <b>F</b> PVIYVNAAFEAATGYRAHEVL         | GRNCRFLQ <b>F</b> RD <b>P</b> HAQRRHPLVDP          | 99  |
| BdFKF1                                                                                            | 57  | AA <b>A</b> I <b>V</b> VADAVEPDPF <b>P</b> VIYVNAAFEAATGYRAHEVL        | GRNCRFLQ <b>F</b> RD <b>P</b> RAQRRHPLVDP          | 114 |
| SiFKF1                                                                                            | 59  | AA <b>A</b> I <b>V</b> VADAAEAD <b>F</b> PVIYVNAAFEAATGYRAHEVL         | GRNCRFLQ <b>F</b> RD <b>P</b> RAQRRHPLVDP          | 116 |
| AtLOV2                                                                                            | 477 | E <b>K</b> <b>N</b> F <b>V</b> ITDPRLPDNP <b>I</b> IFASDSFLELTEYSREEIL | GRNCRFLQ <b>G</b> -----PETDL                       | 522 |
| GmLOV2                                                                                            | 457 | E <b>K</b> <b>N</b> F <b>V</b> ITDPRLPDNP <b>I</b> IFASDSFLELTEYSREEIL | GRNCRFLQ <b>G</b> -----PETDP                       | 505 |
| OsLOV2                                                                                            | 412 | E <b>K</b> <b>N</b> F <b>V</b> ITDPRLPDNP <b>I</b> IFASDSFLQLTEYNREEIL | GRNCRFLQ <b>G</b> -----PETDR                       | 460 |
| ZmLOV2                                                                                            | 400 | E <b>K</b> <b>N</b> F <b>V</b> ITDPRLPDNP <b>I</b> IFASDSFLRLTEYCREEIL | GRNCRFLQ <b>G</b> -----PETDR                       | 448 |
| BdLOV2                                                                                            | 409 | E <b>K</b> <b>N</b> F <b>V</b> ITDPRLPDNP <b>I</b> IFASDSFLQLTEYCREEIL | GRNCRFLQ <b>G</b> -----PETDR                       | 457 |
| AsLOV2                                                                                            | 412 | E <b>K</b> <b>N</b> F <b>V</b> ITDPRLPDNP <b>I</b> IFASDSFLQLTEYSREEIL | GRNCRFLQ <b>G</b> -----PETDR                       | 460 |
| .: : : *       *   * : : . .       *       *   *       . :   : *   * * * * *   E-F Loop   *   . * |     |                                                                        |                                                    |     |

|                                                                                   |     |                                                                                                          |     |
|-----------------------------------------------------------------------------------|-----|----------------------------------------------------------------------------------------------------------|-----|
| AtZTL                                                                             | 102 | MVVSEIRKCIDEGIEFQGELLNFRKDG <b>S</b> PLMNRLRLTPIYGD <b>D</b> DTITHIIGI <b>Q</b> FFIETD                   | 160 |
| AtLKP2                                                                            | 92  | TIVAKMRQCLENGIEFQGELLNFRKDG <b>S</b> PLMNKLRLVPIREED <b>E</b> - ITHFIGVLL <b>F</b> TD <b>A</b> K         | 149 |
| GmZTL                                                                             | 102 | TVVSEIRRCLEEGIEFQGELLNFRKDG <b>S</b> PLMNRLRLTPIYGD <b>D</b> ETITHVIGI <b>Q</b> FFTEAN                   | 160 |
| OsZTL1                                                                            | 115 | MVVSEIRKCIDNGTEFRGDLLNFRKDG <b>S</b> PLMNKLHLTPIYGD <b>D</b> ETITHYMGI <b>Q</b> FFTNAN                   | 173 |
| OsZTL2                                                                            | 111 | TVVTDIRRCLEEGTVFQGDLLNFRKDG <b>S</b> PFMAKLQLTPIYGD <b>D</b> ETITHYMG <b>M</b> QFFNDSN                   | 169 |
| CsZTL                                                                             | 96  | SVVSEIRRCLEDGTEFQGELLNFRKDG <b>T</b> PLMNKLRLTPIYGD <b>D</b> ETVTHVIGI <b>Q</b> FFTEAD                   | 155 |
| CcZTL1                                                                            | 103 | SVVSEIRRCLEEGIEFQGELLNFRKDG <b>S</b> PLMNRLRLSP <b>I</b> YGD <b>D</b> ETITHVIGI <b>Q</b> FFTEAN          | 161 |
| GhZTL1                                                                            | 95  | TVVSEIRRCLEDEGIEFQGELLNFRKDG <b>S</b> PLMNRLRLTPIYGD <b>D</b> ETITHVIGI <b>Q</b> FFTEAN                  | 153 |
| ZmZTL1                                                                            | 114 | ALVSEIRRCIDNGIEFRGDLLNFRKDG <b>S</b> PVMNRLHLTPIYGD <b>D</b> ETITHYMGI <b>Q</b> FFTDAN                   | 172 |
| ZmZTL2                                                                            | 97  | AVVTRIRRCLEDEGTEFHGDLLNFRKDC <b>S</b> PYMARLQLTPIYGD <b>D</b> EVITHYMGI <b>Q</b> FFNDSN                  | 155 |
| BdZTL2                                                                            | 104 | IVVAEIQRCCLEEGTEFQGDLLNFRKDG <b>S</b> PFMTNLQLKPIYGD <b>D</b> ETITHYMGI <b>Q</b> FFNDSN                  | 162 |
| BdZTL2                                                                            | 146 | AVVSGIQRCIDNGTQFRGDLLNFRKDG <b>F</b> PLMNRLHLTPIYGD <b>D</b> DIITHYMGI <b>Q</b> FFTNAN                   | 203 |
| SiZTL1                                                                            | 116 | AMVSNIRRCIDNGTEFRGDLLNFRKDG <b>S</b> PLMNRLHLTPIYGD <b>D</b> ATITHYMGI <b>Q</b> FFTNAN                   | 174 |
| SiZTL2                                                                            | 104 | AVVSGIRRCLEEGTEFQGDLLNFRKDG <b>S</b> PYMAKLQITPIYGD <b>D</b> DMITHYMGI <b>Q</b> FFNDSN                   | 162 |
| Bra038832                                                                         | 95  | TVVSKMRRCLEKGIEFQGELLNFRKDG <b>S</b> PLMNKLRLVPIRED <b>D</b> E- ITHIIGVL <b>F</b> FT <b>D</b> AK         | 152 |
| Bra038831                                                                         | 98  | TVVSKMRQCLEKGIEFQGELLNFRKDG <b>S</b> PLMNKLRLVPIREED <b>E</b> - ITHFIGVLS <b>F</b> TT <b>D</b> AE        | 155 |
| Bra038830                                                                         | 98  | TVVSKMRQCLEKGIEFQGELLNFRKDG <b>S</b> PLMNKLRLVPIRED <b>D</b> E- ITHFIGVLS <b>F</b> TT <b>D</b> AD        | 155 |
| MpFKF1                                                                            | 118 | TIVATIKRCLSEGVEFRGELLNFRKDG <b>T</b> PLMNKLCMTPIHAEDGTITHVIGI <b>Q</b> S <b>F</b> TEAK                   | 176 |
| SmFKF1                                                                            | 62  | ATVTEIRRCMREGIEFWGELLNFRKDG <b>T</b> PLMNKLCLKPIRGEDGRITHIIGI <b>Q</b> S <b>F</b> SEVK                   | 120 |
| AtFKF1                                                                            | 110 | VVVSEIRRCLEEGIEFQGELLNFRKDG <b>T</b> PLVNRLRLAPIR <b>D</b> DDGTITHVIGI <b>Q</b> V <b>F</b> SETT          | 168 |
| GmFKF1                                                                            | 106 | VVVSEIRRCLEEGVEFQGELLNFRKDG <b>T</b> PLVNRLRLAPIH <b>D</b> DDGTVTHVIGI <b>Q</b> L <b>F</b> SEAN          | 164 |
| OsFKF1                                                                            | 122 | MVVSEIRRCLENEGIEFQGELLNFRKDGAPLYNRLRLIPMHGDDGFVTHVIGI <b>Q</b> L <b>F</b> SEAN                           | 180 |
| CsFKF1                                                                            | 115 | VVVSEIRRCLEEGVEFQGELLNFRKDG <b>T</b> PMVNRLRLAPIH <b>D</b> DDGTVTHIIGI <b>Q</b> V <b>F</b> SETK          | 173 |
| CcFKF1                                                                            | 130 | VVVSEIRRCLEEGIEFQGELLNFKKDG <b>T</b> PLVNRLRLAPIR <b>D</b> DDGTVTHIIGI <b>Q</b> I <b>F</b> SEAK          | 188 |
| GhFKF1                                                                            | 113 | FVVSEIRRCLEEGIEFEGELLNFRKDG <b>T</b> PLVNRLKLAPIR <b>D</b> DDGIVTHVIGI <b>Q</b> V <b>Y</b> SEAK          | 171 |
| ZmFKF1                                                                            | 100 | MVVSEIRRCLESEGIEFQGELLNFRKDGAPLHNRLRLVPMHGDDGYVTHVIGI <b>Q</b> L <b>F</b> SEAN                           | 158 |
| BdFKF1                                                                            | 115 | MVVSEMRRCLNDGIEFEGELLNFRKDGAPLNNRLRLIPMHGDDGSMTHIIAI <b>Q</b> L <b>F</b> SDAN                            | 173 |
| SiFKF1                                                                            | 117 | MVVSEIRRCLENEGIEFQGELLNFRKDGAPLYNRLRLIPMHGDDG <b>S</b> VTHVIGI <b>Q</b> L <b>F</b> SEAN                  | 175 |
| AtLOV2                                                                            | 523 | TTVKKIRNAIDNQTEVTVQLIN <b>Y</b> TKSGKKFWN <b>L</b> FHLQPMRDQKGEVQYFIGV <b>Q</b> L <b>D</b> GSKH          | 581 |
| GmLOV2                                                                            | 506 | ATVRKIREAIDNQTDVTVQLIN <b>Y</b> TKSGKKFWN <b>L</b> FHLQPMRDQKGEVQYFIGV <b>Q</b> L <b>D</b> G <b>S</b> QH | 564 |
| OsLOV2                                                                            | 461 | ATVRKIRDAIDNQAEVTVQLIN <b>Y</b> TKSGKKFWN <b>L</b> FHLQPMRDQKGDVQYFIGV <b>Q</b> L <b>D</b> GTEH          | 519 |
| ZmLOV2                                                                            | 449 | GTVKKIRDAIDNQTEVTVQLIN <b>Y</b> TKSGKKFWN <b>L</b> FHLQPMRDQKGDVQYFIGV <b>Q</b> L <b>D</b> GTER          | 507 |
| BdLOV2                                                                            | 458 | ATVRKIRDAIDNQTDVTVQLIN <b>Y</b> TKSGKKFWN <b>L</b> FHLQPMRDQKGDVQYFIGV <b>Q</b> L <b>D</b> GTEH          | 516 |
| AsLOV2                                                                            | 461 | ATVRKIRDAIDNQTEVTVQLIN <b>Y</b> TKSGKKFWN <b>L</b> FHLQPMRDQKGDVQYFIGV <b>Q</b> L <b>D</b> GTEH          | 519 |
| *       : :   . :   .       : * : :   * . *       :   :   * :   . :   :   :   : : |     |                                                                                                          |     |
