# Supplementary figures and images for: Kinetics of the LOV domain of ZEITLUPE determine its circadian function in Arabidopsis
Source: eLife journal article supplement (doi:10.7554/elife.21646), 2017-02-28

Main ZTL interactions and functions

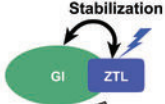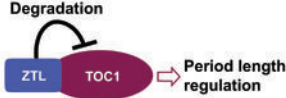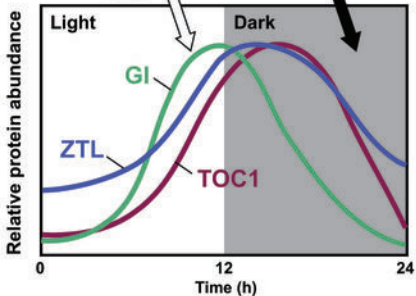

Supplement: supp [file elife_poa_e21646_Figure_1_figure_supplement_2.pdf › elife_poa_e21646_Figure_1_figure_supplement_2.pdf]

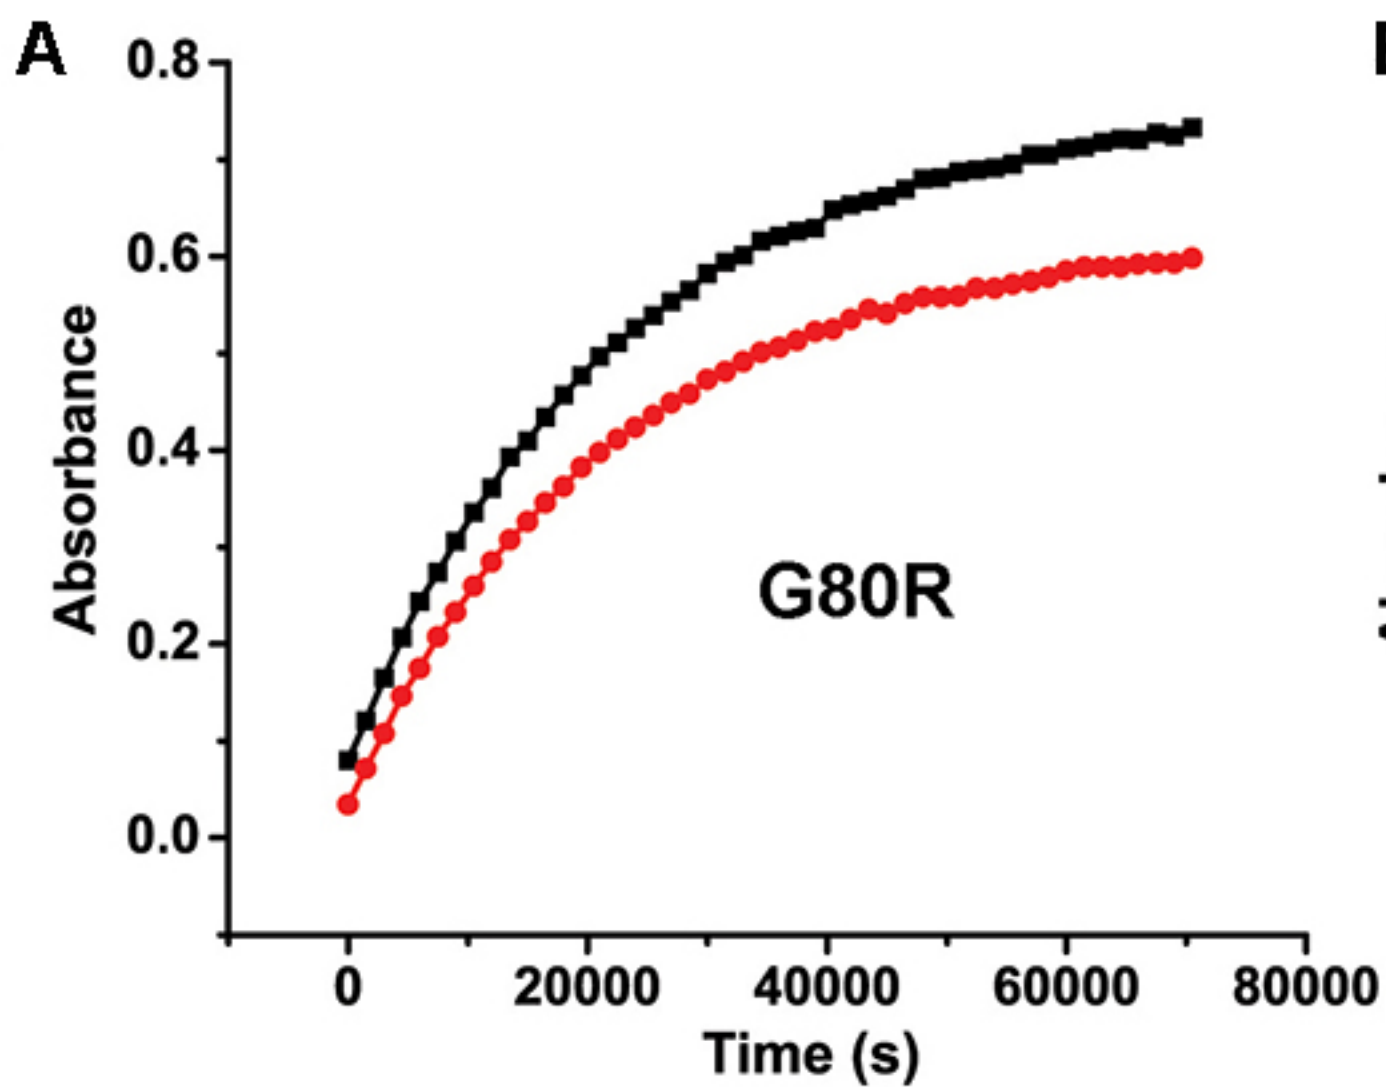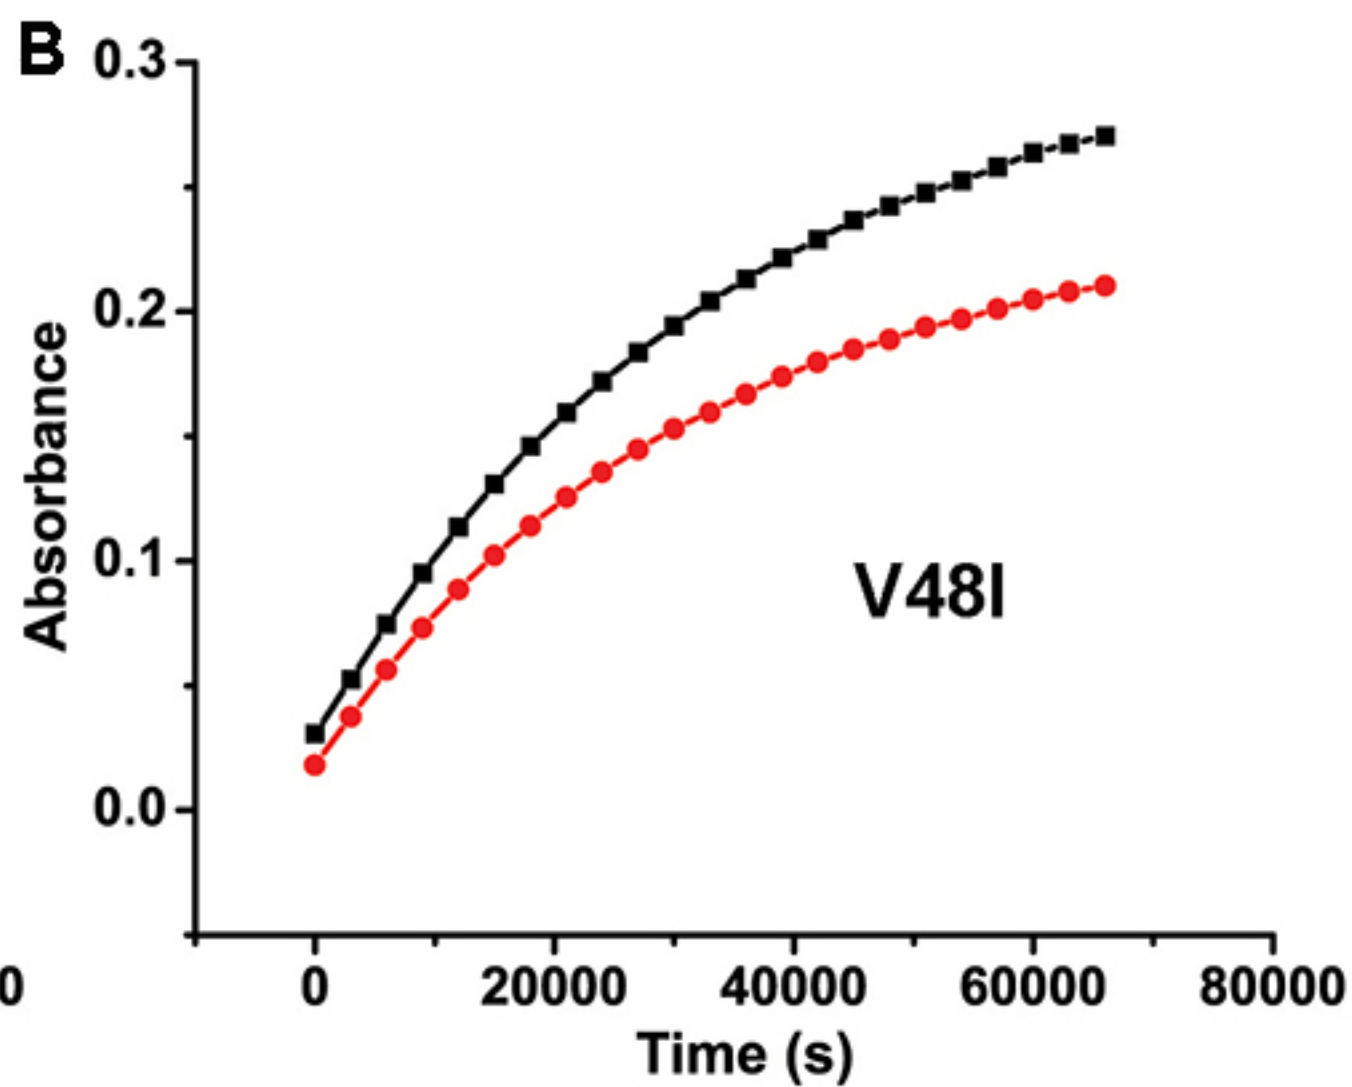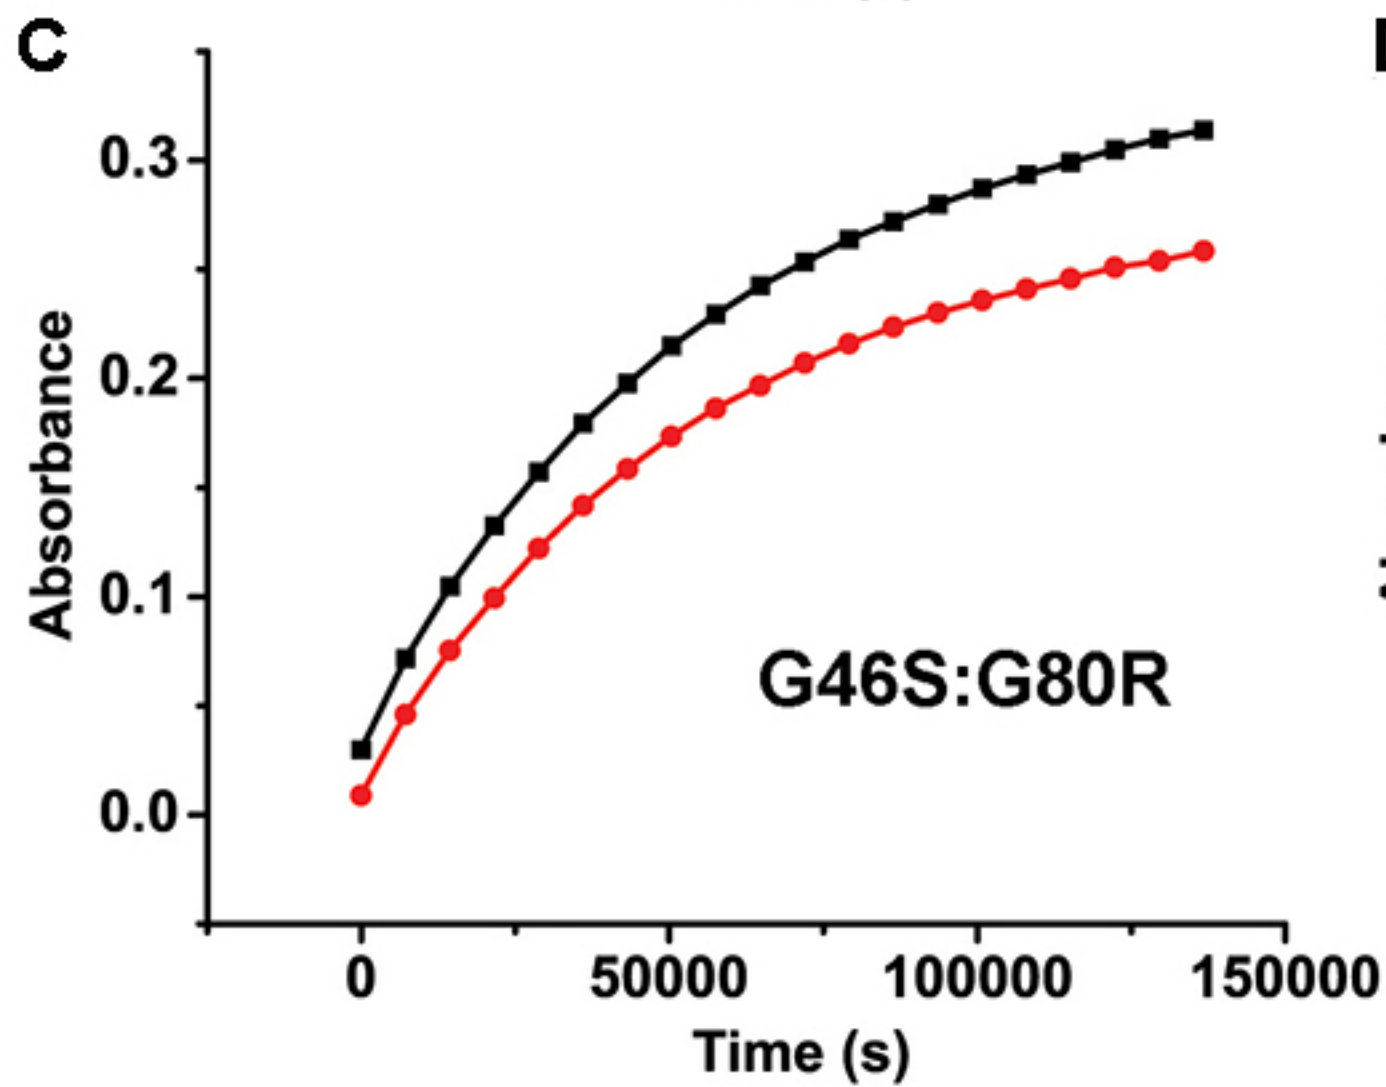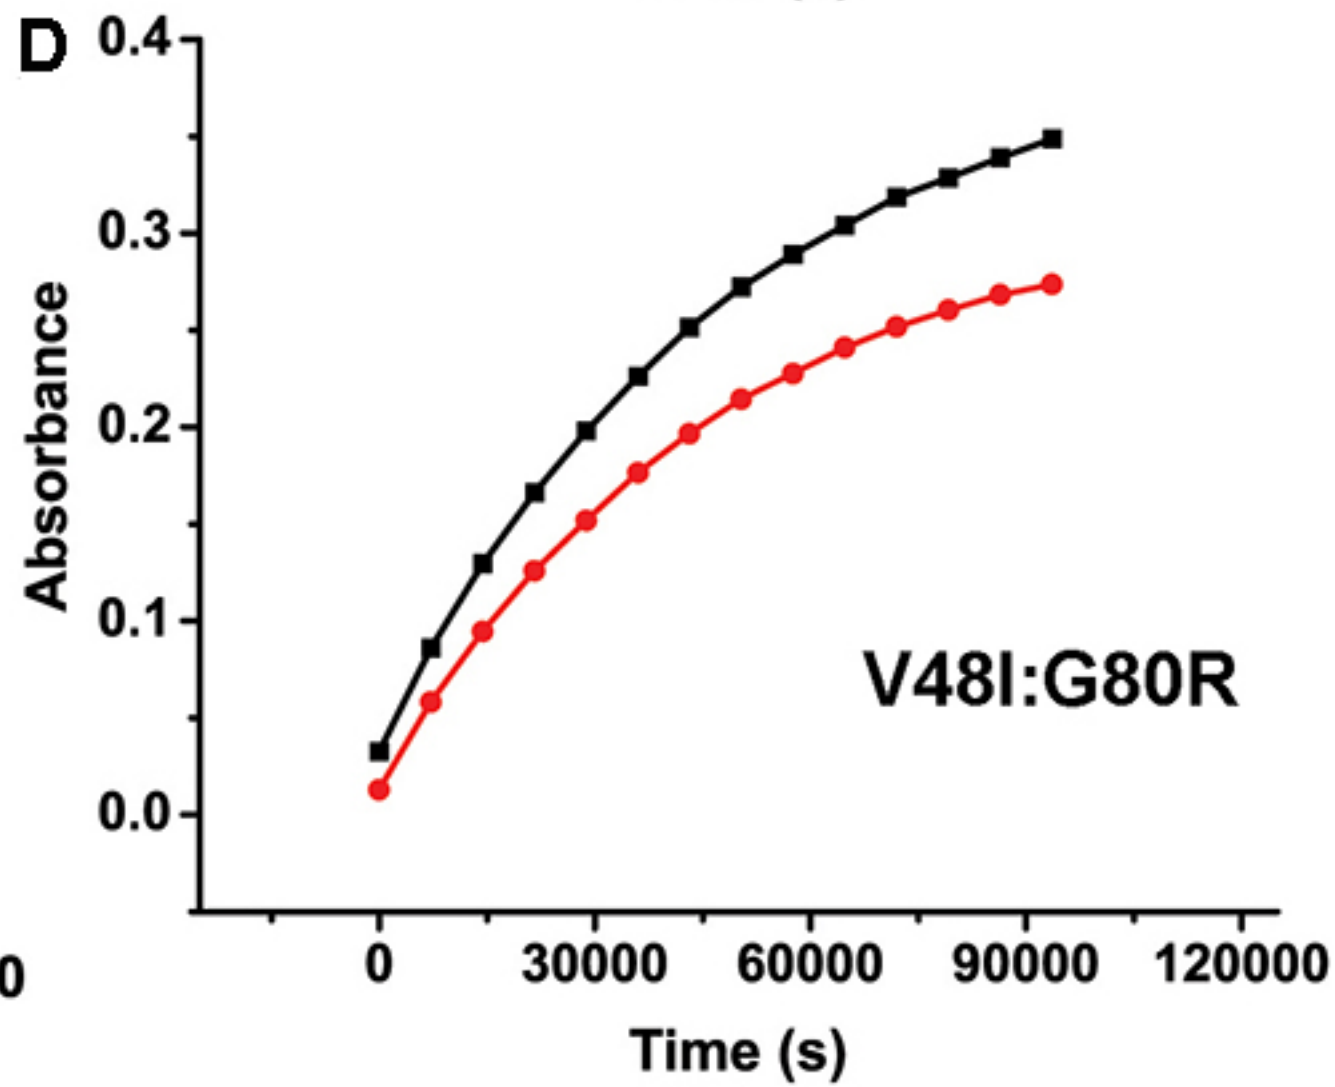

Supplement: supp [file elife_poa_e21646_Figure_1_figure_supplement_3.pdf › elife_poa_e21646_Figure_1_figure_supplement_3.pdf]

**A**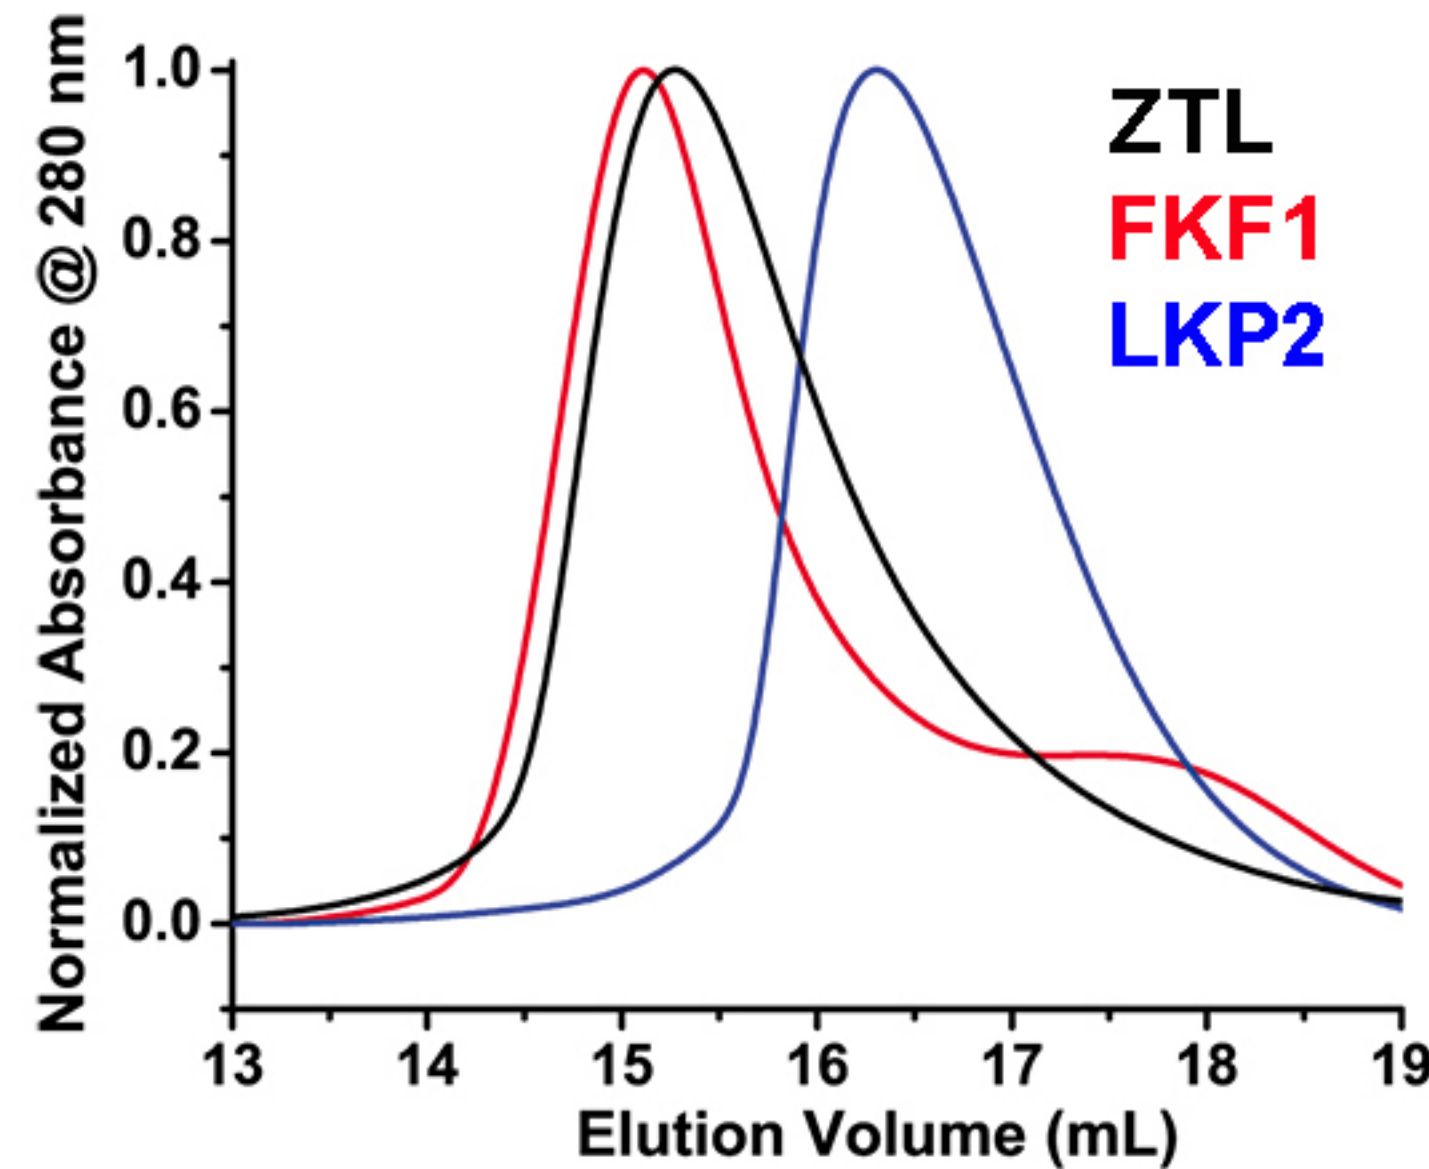**B**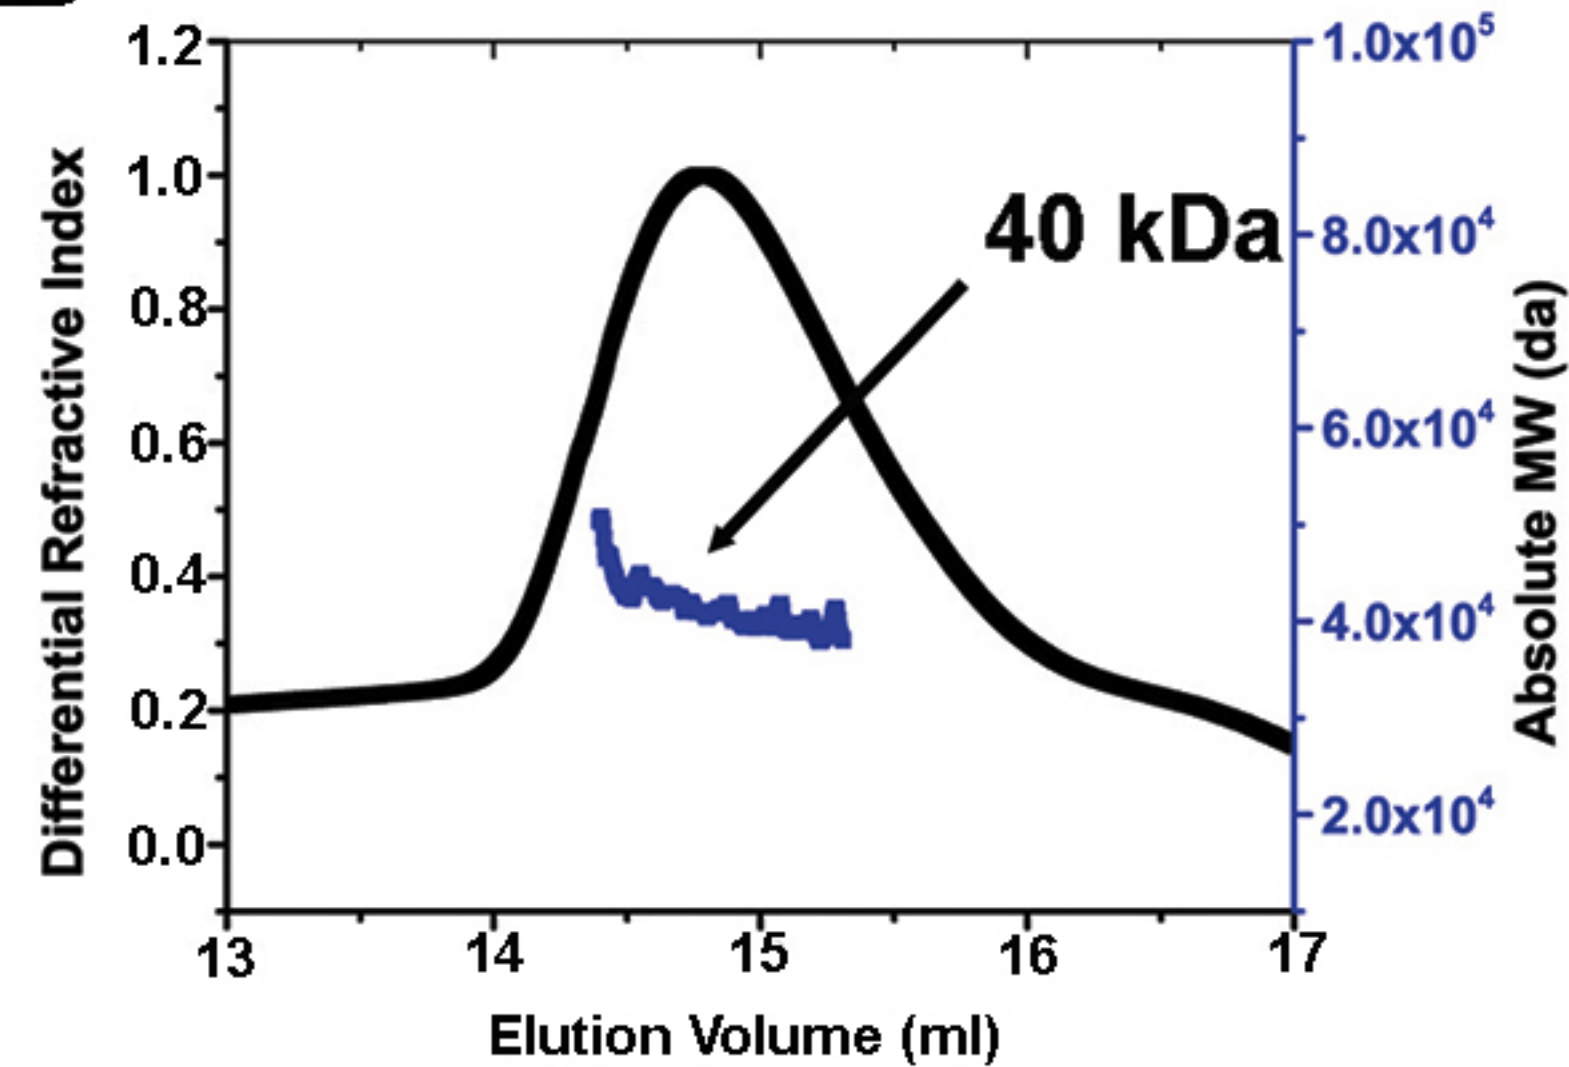**C**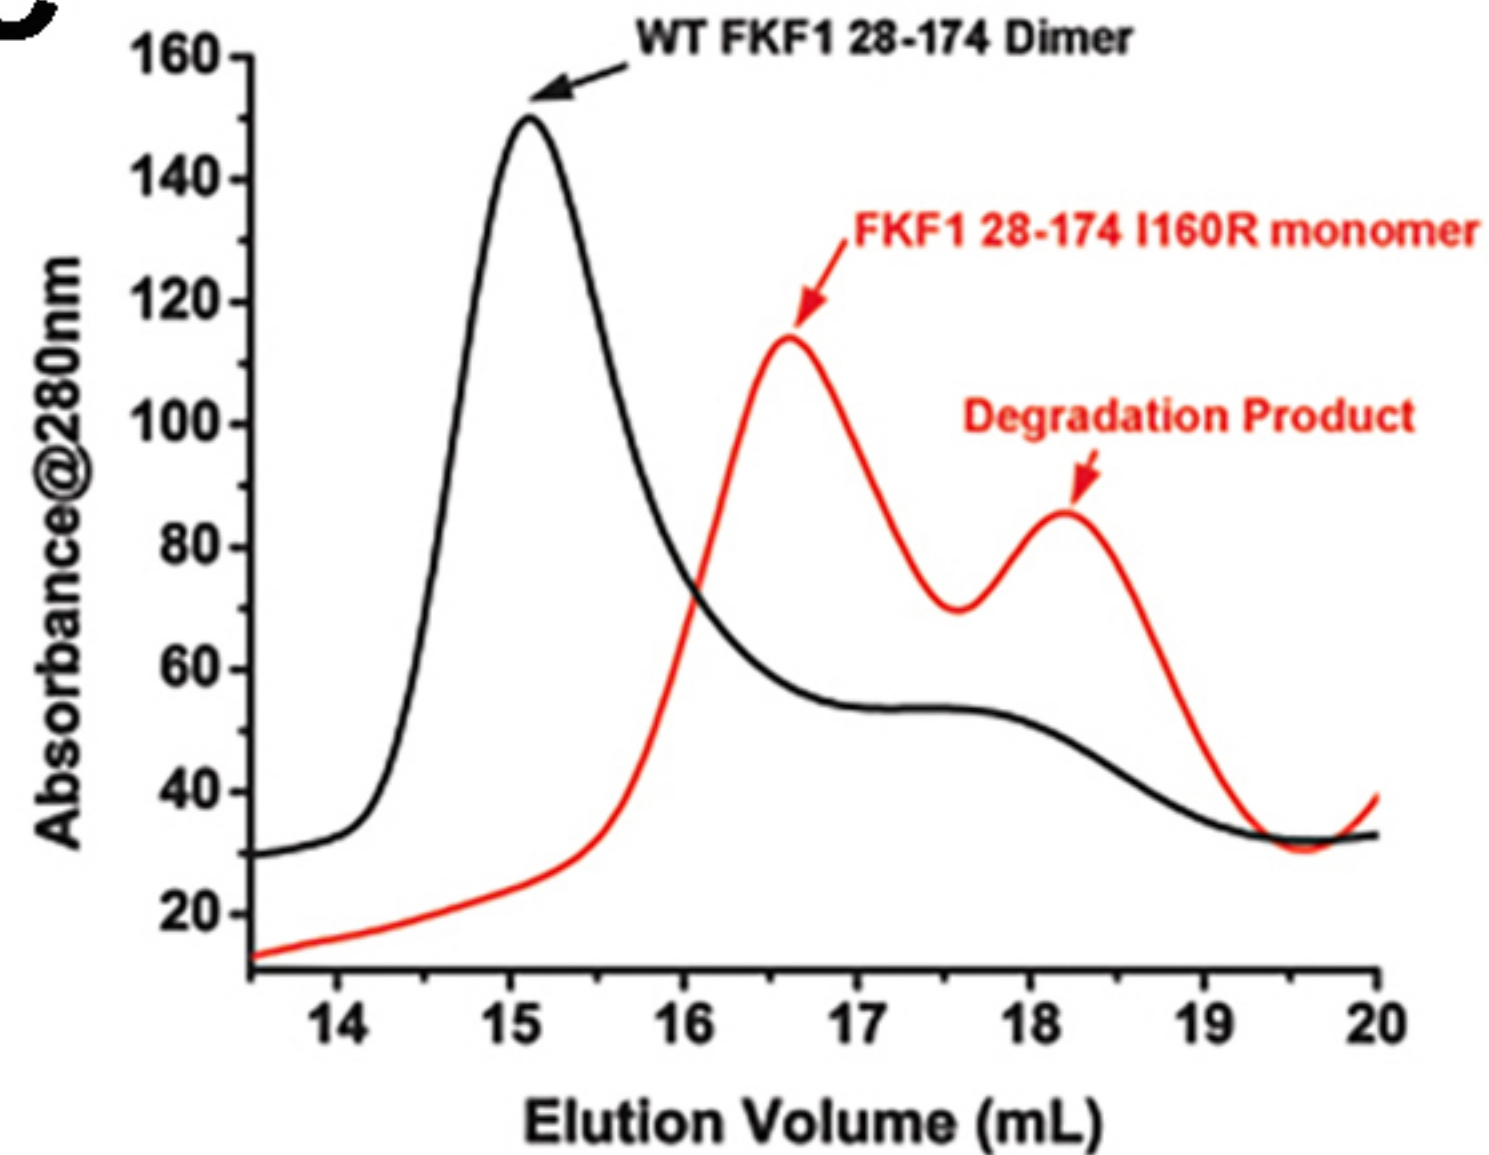

Supplement: supp [file elife_poa_e21646_Figure_2_figure_supplement_1.pdf › elife_poa_e21646_Figure_2_figure_supplement_1.pdf]

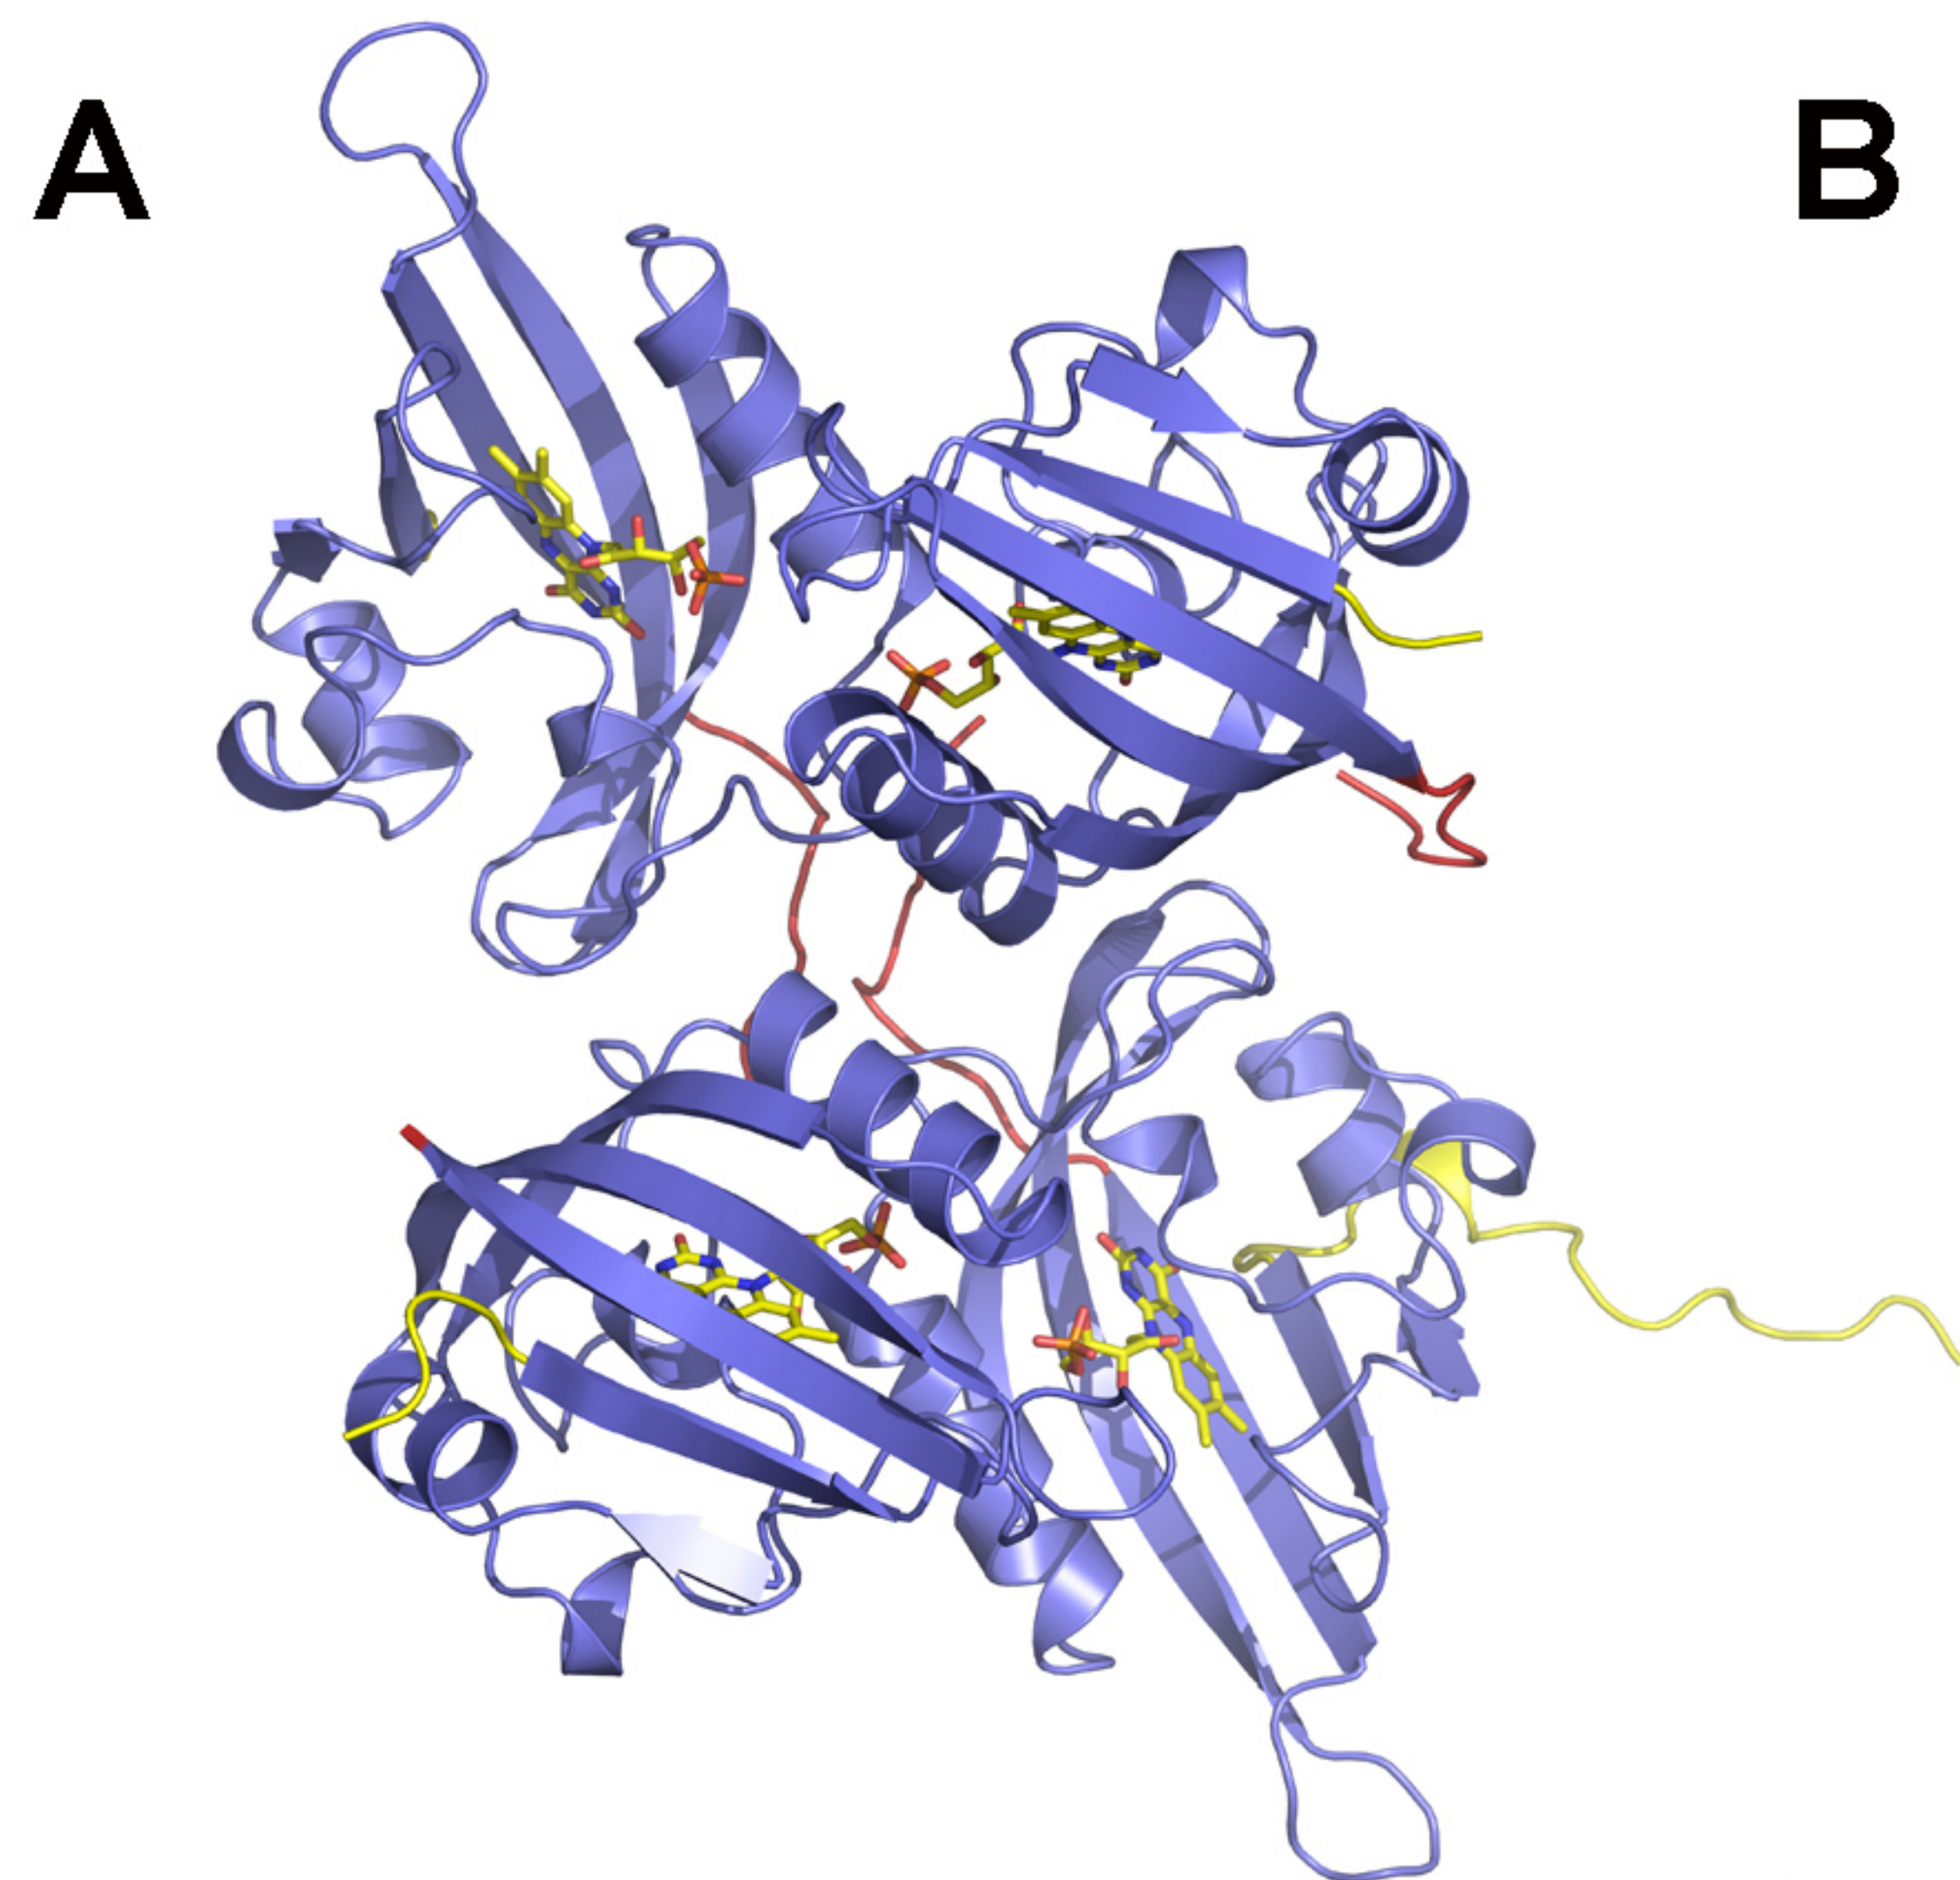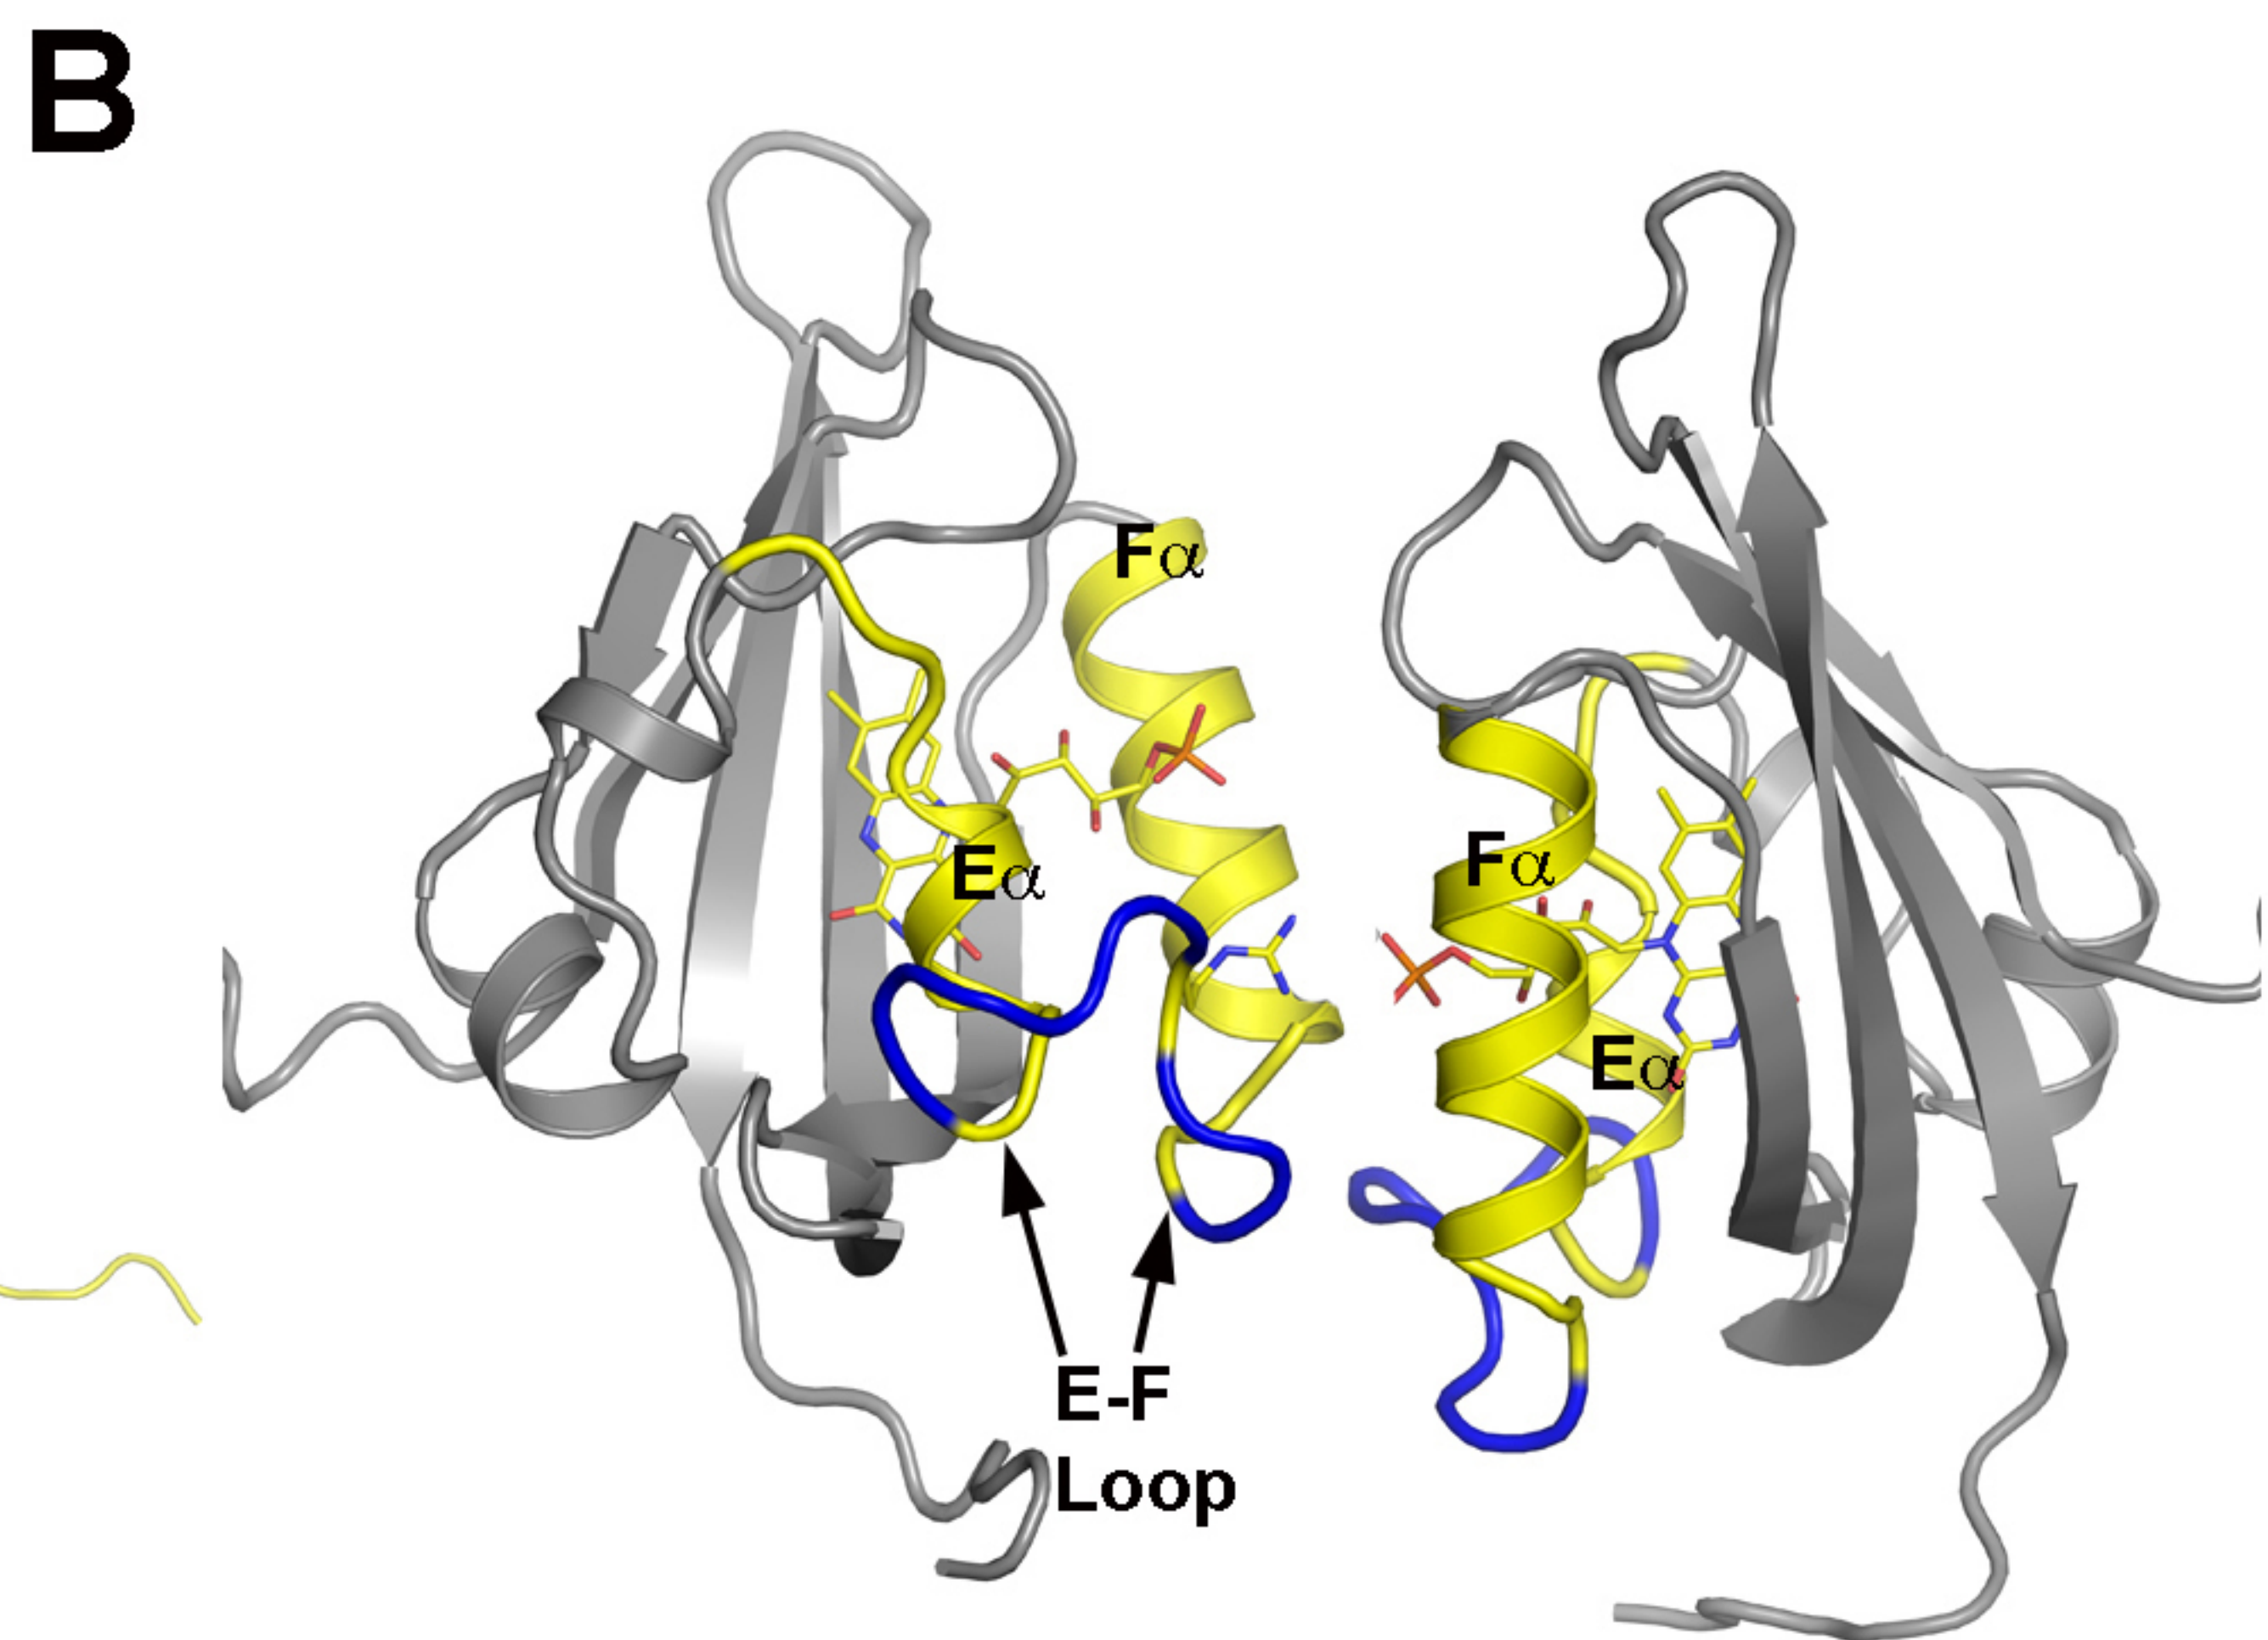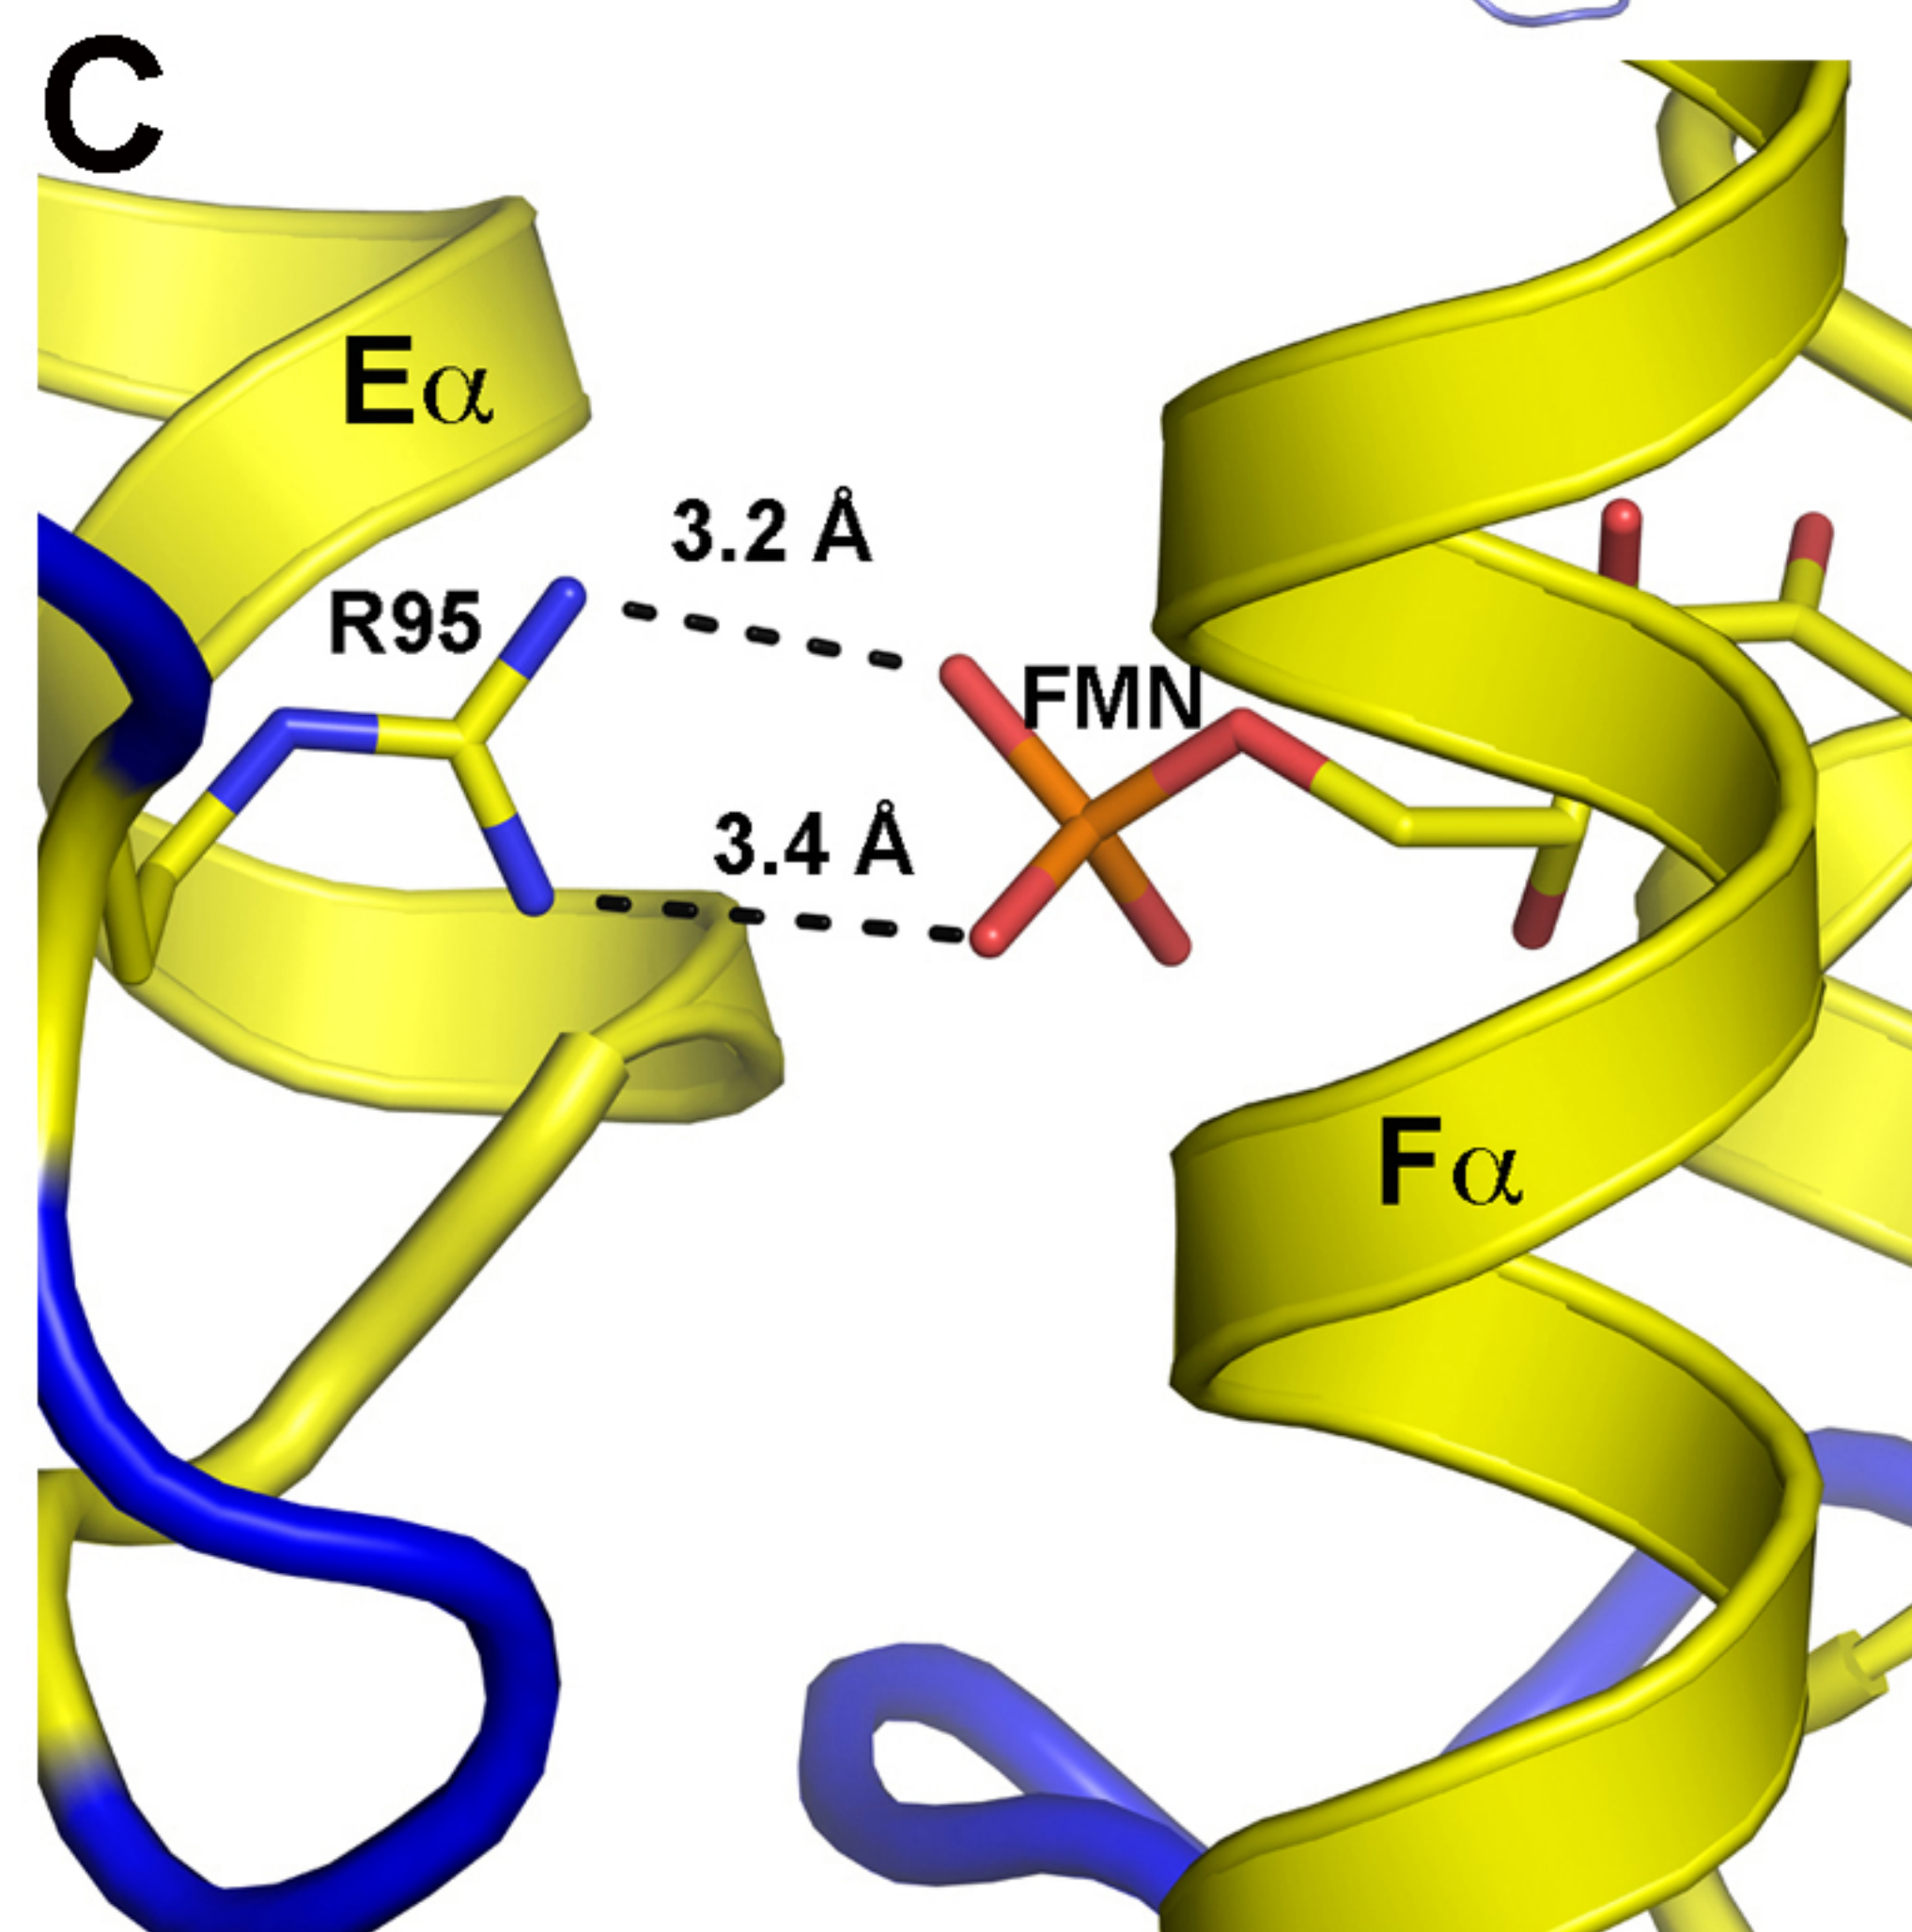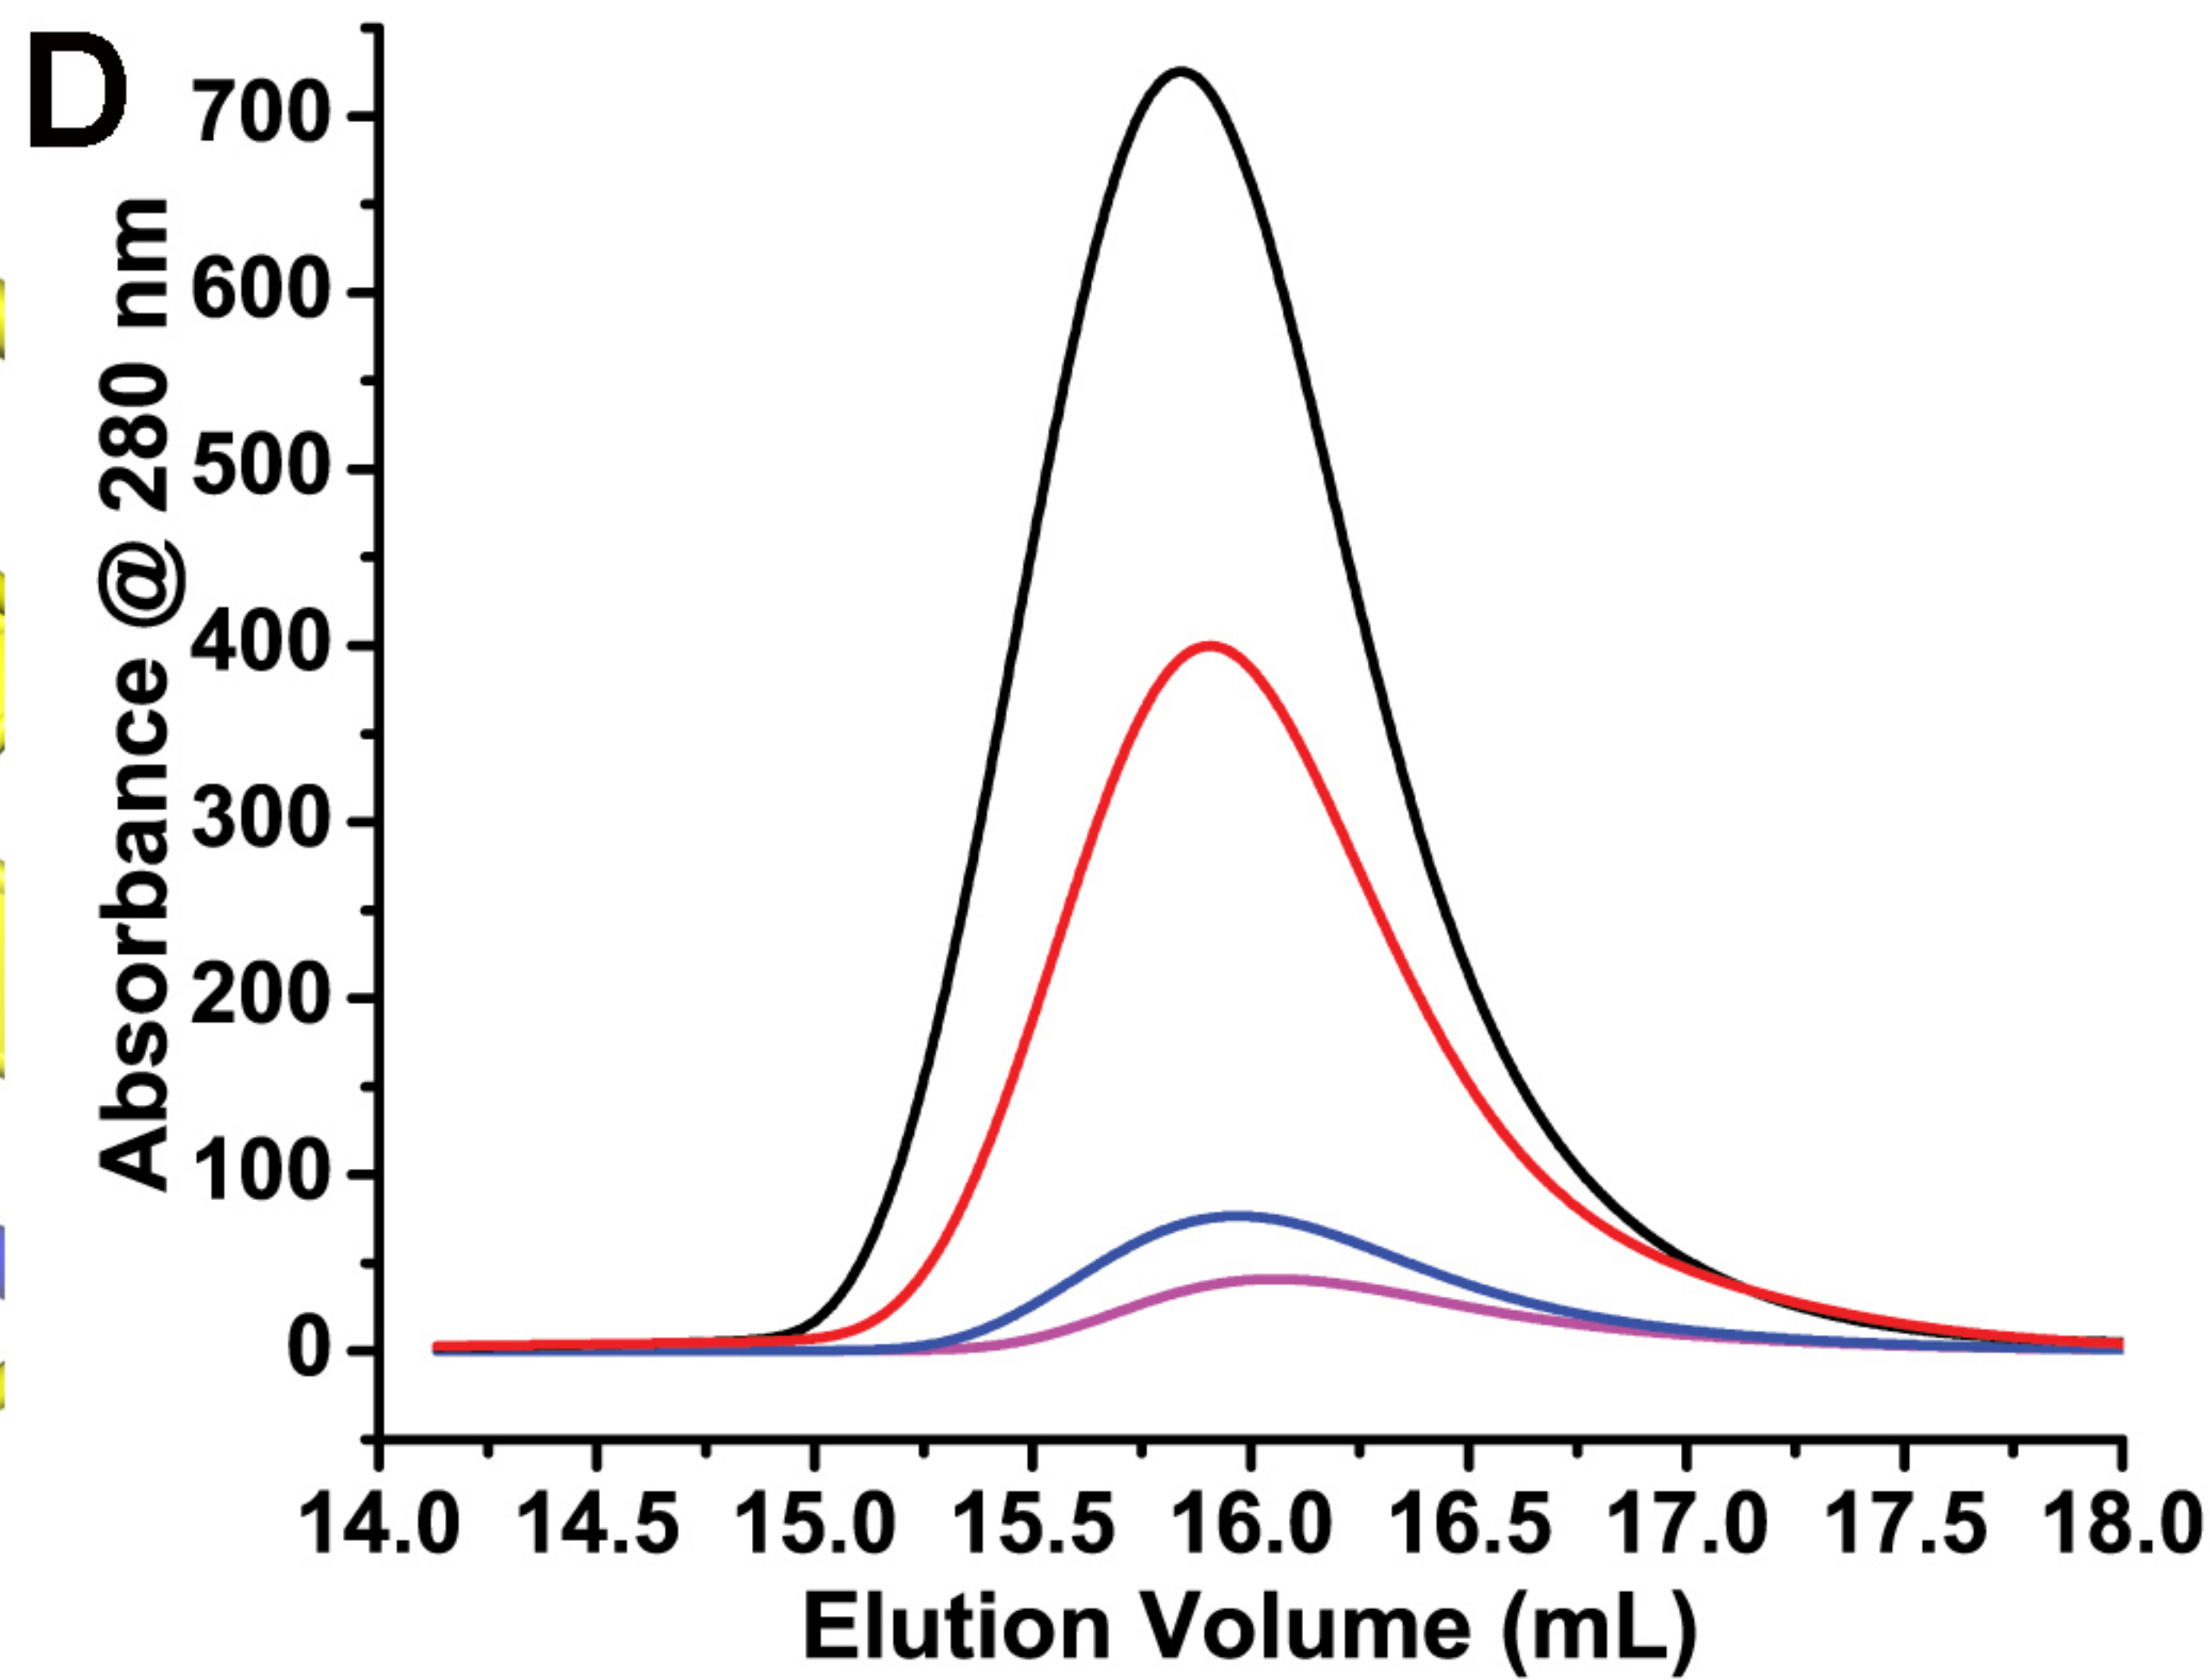

Supplement: supp [file elife_poa_e21646_Figure_2_figure_supplement_2.pdf › elife_poa_e21646_Figure_2_figure_supplement_2.pdf]

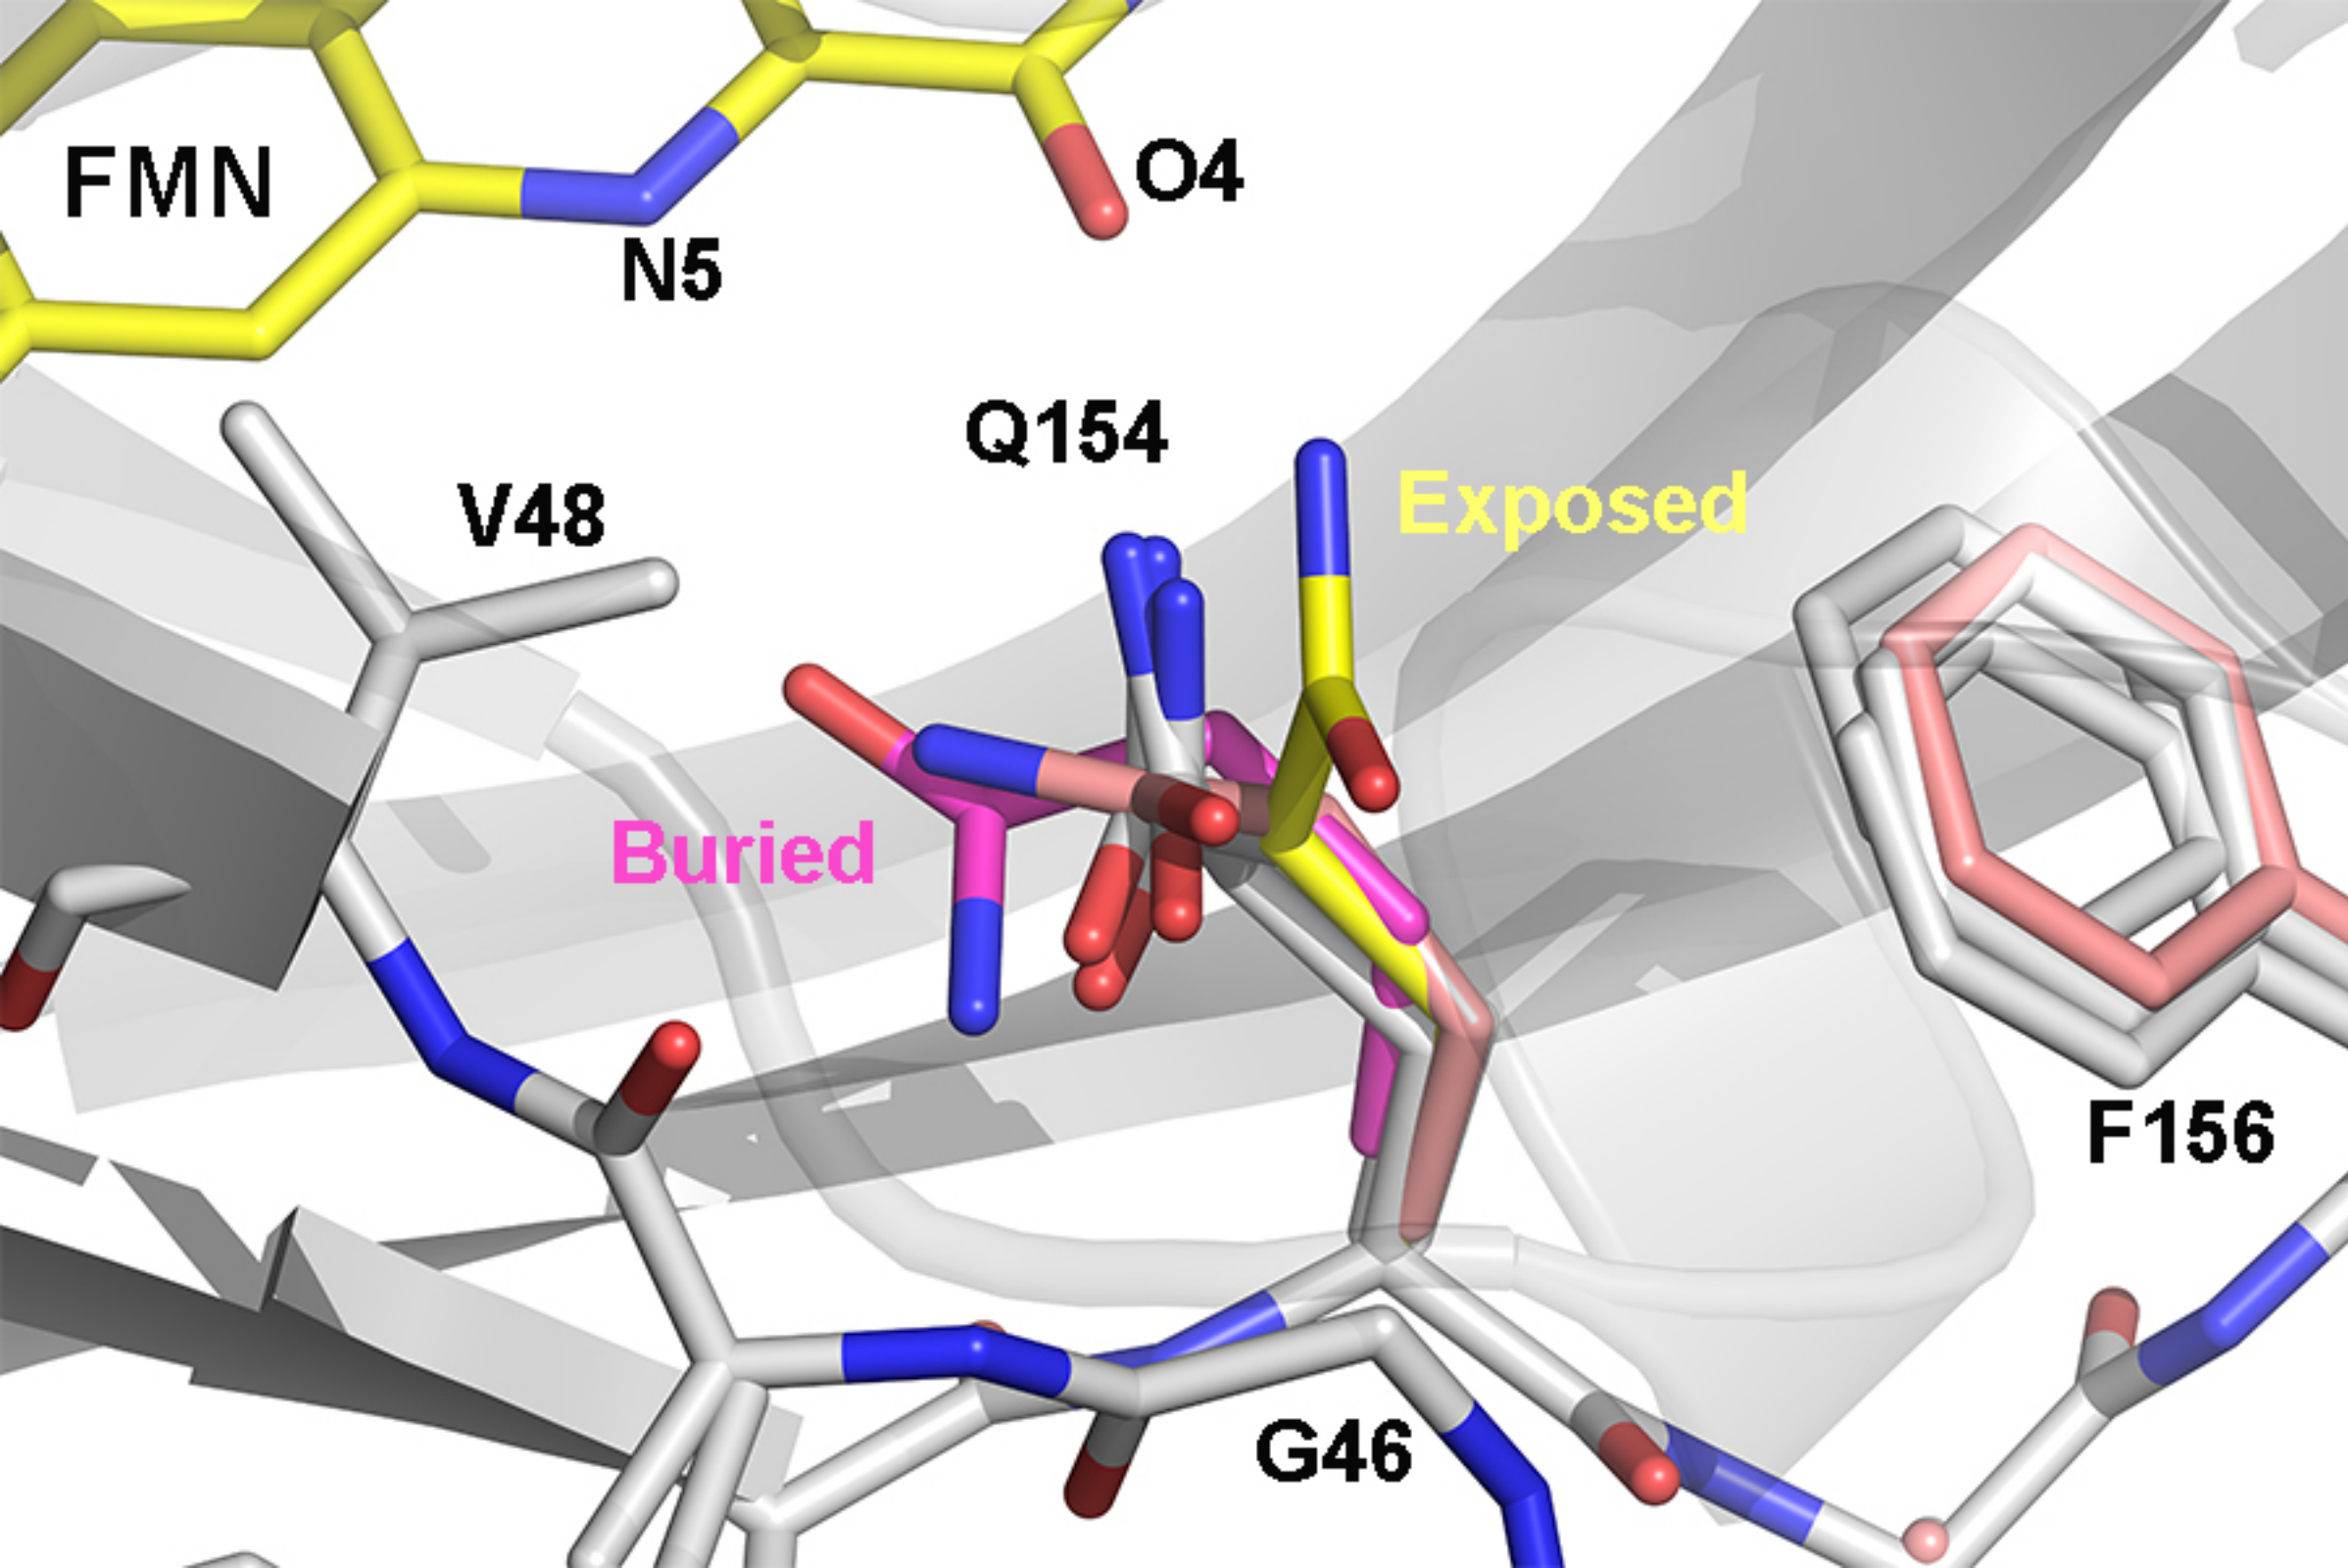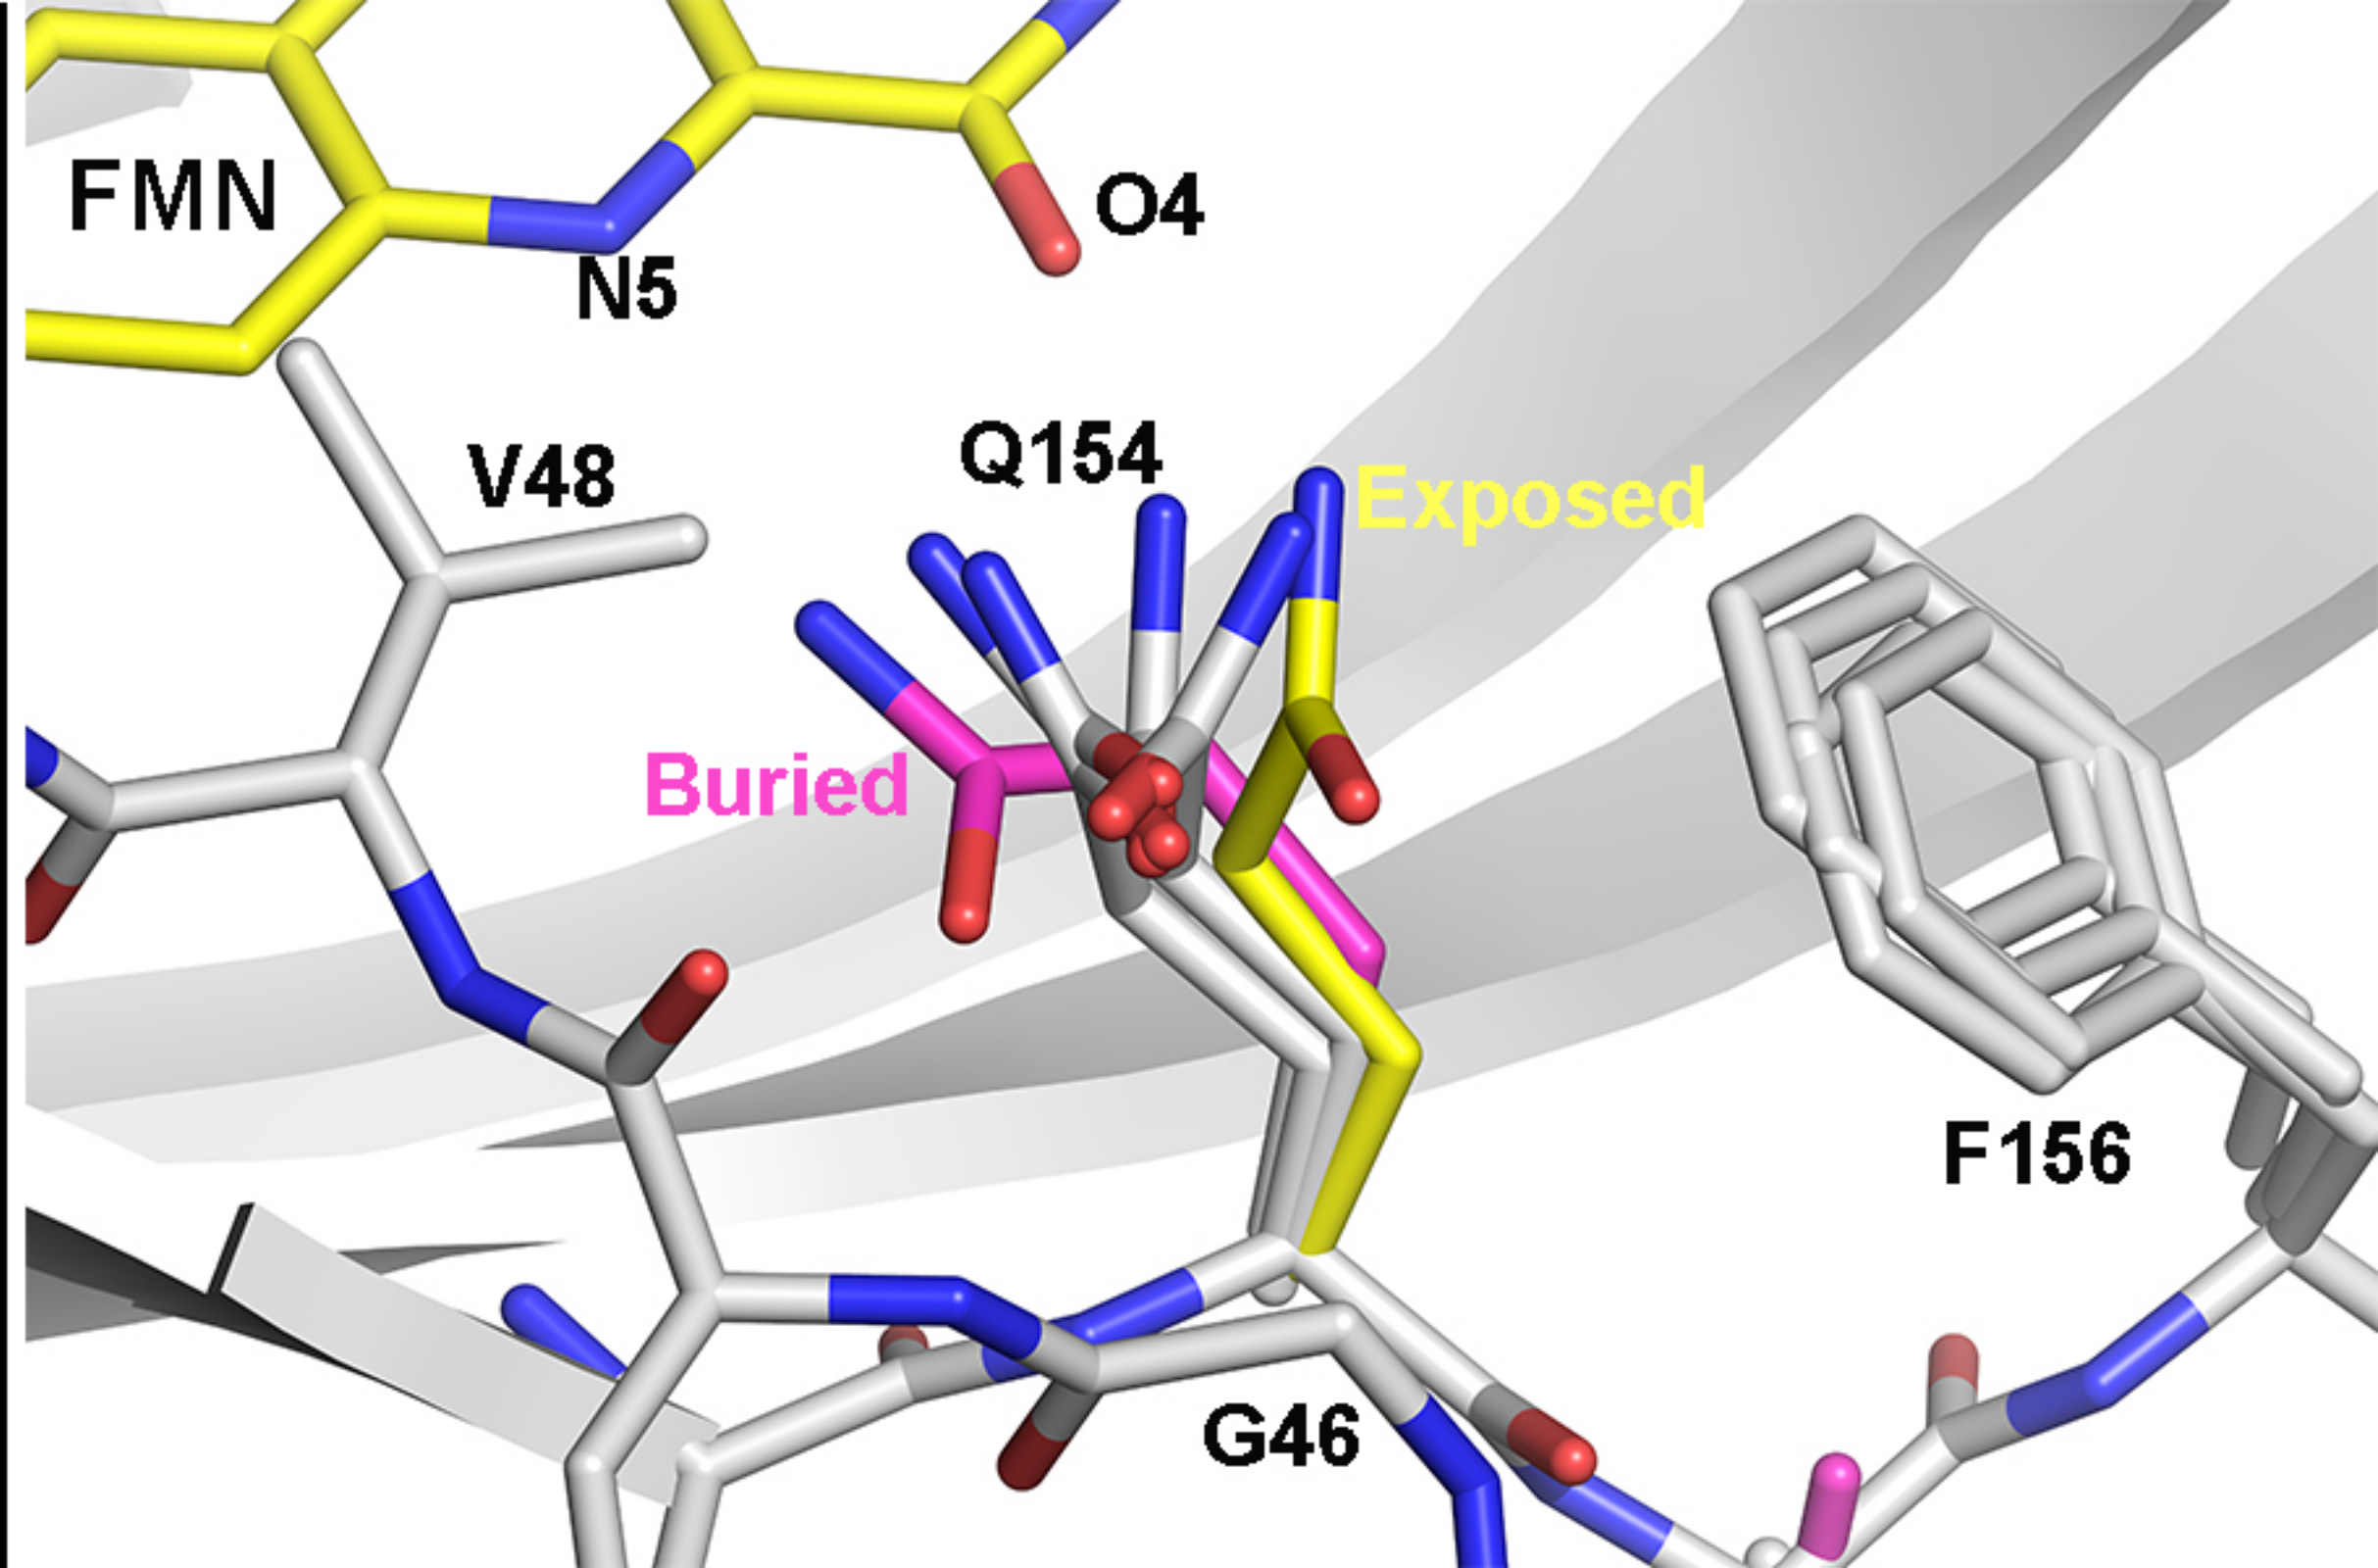

Supplement: supp [file elife_poa_e21646_Figure_3_figure_supplement_1.pdf › elife_poa_e21646_Figure_3_figure_supplement_1.pdf]

**A**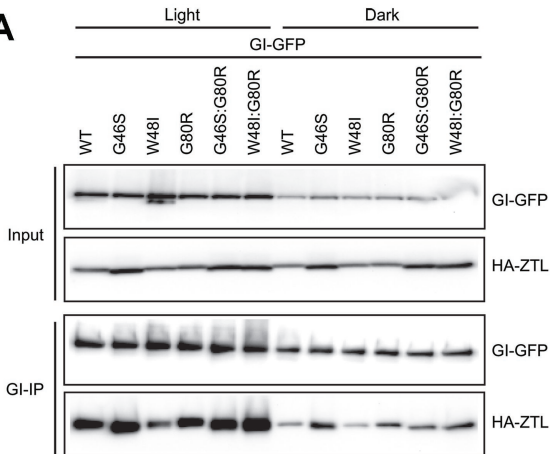**B**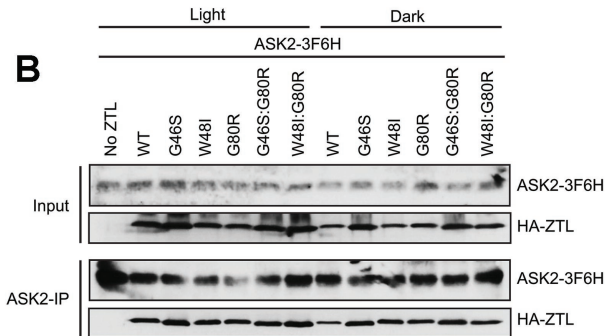

Supplement: supp [file elife_poa_e21646_Figure_4_figure_supplement_1.pdf › elife_poa_e21646_Figure_4_figure_supplement_1.pdf]

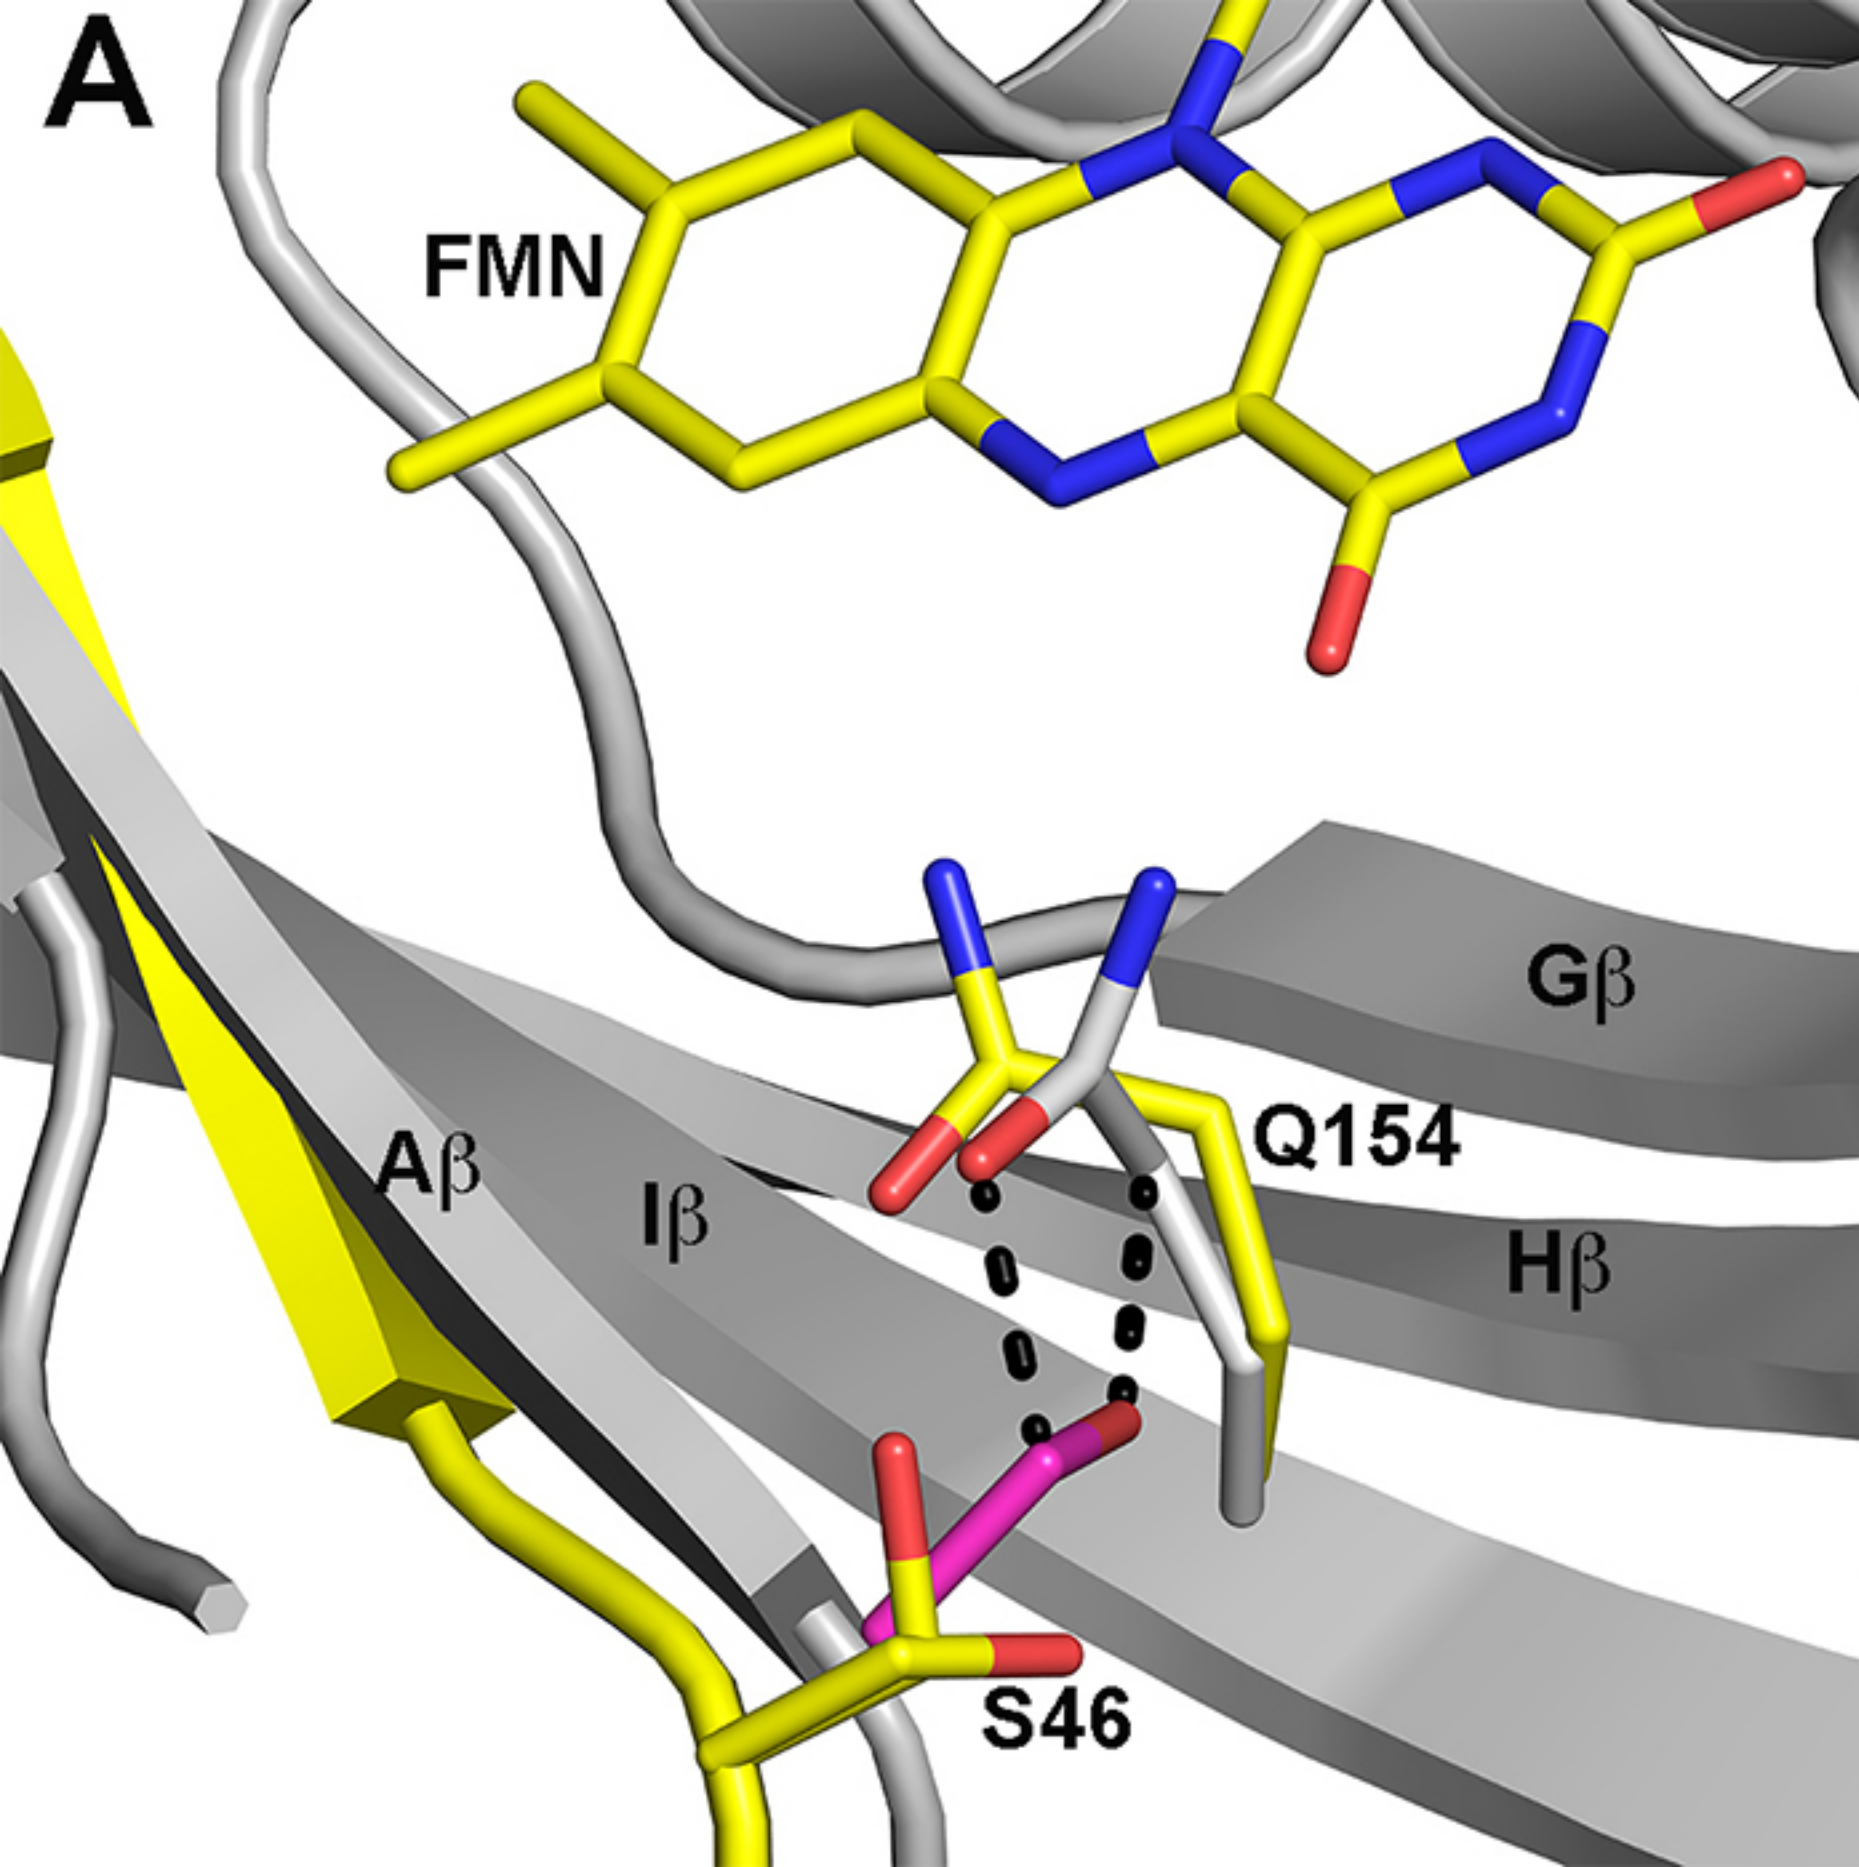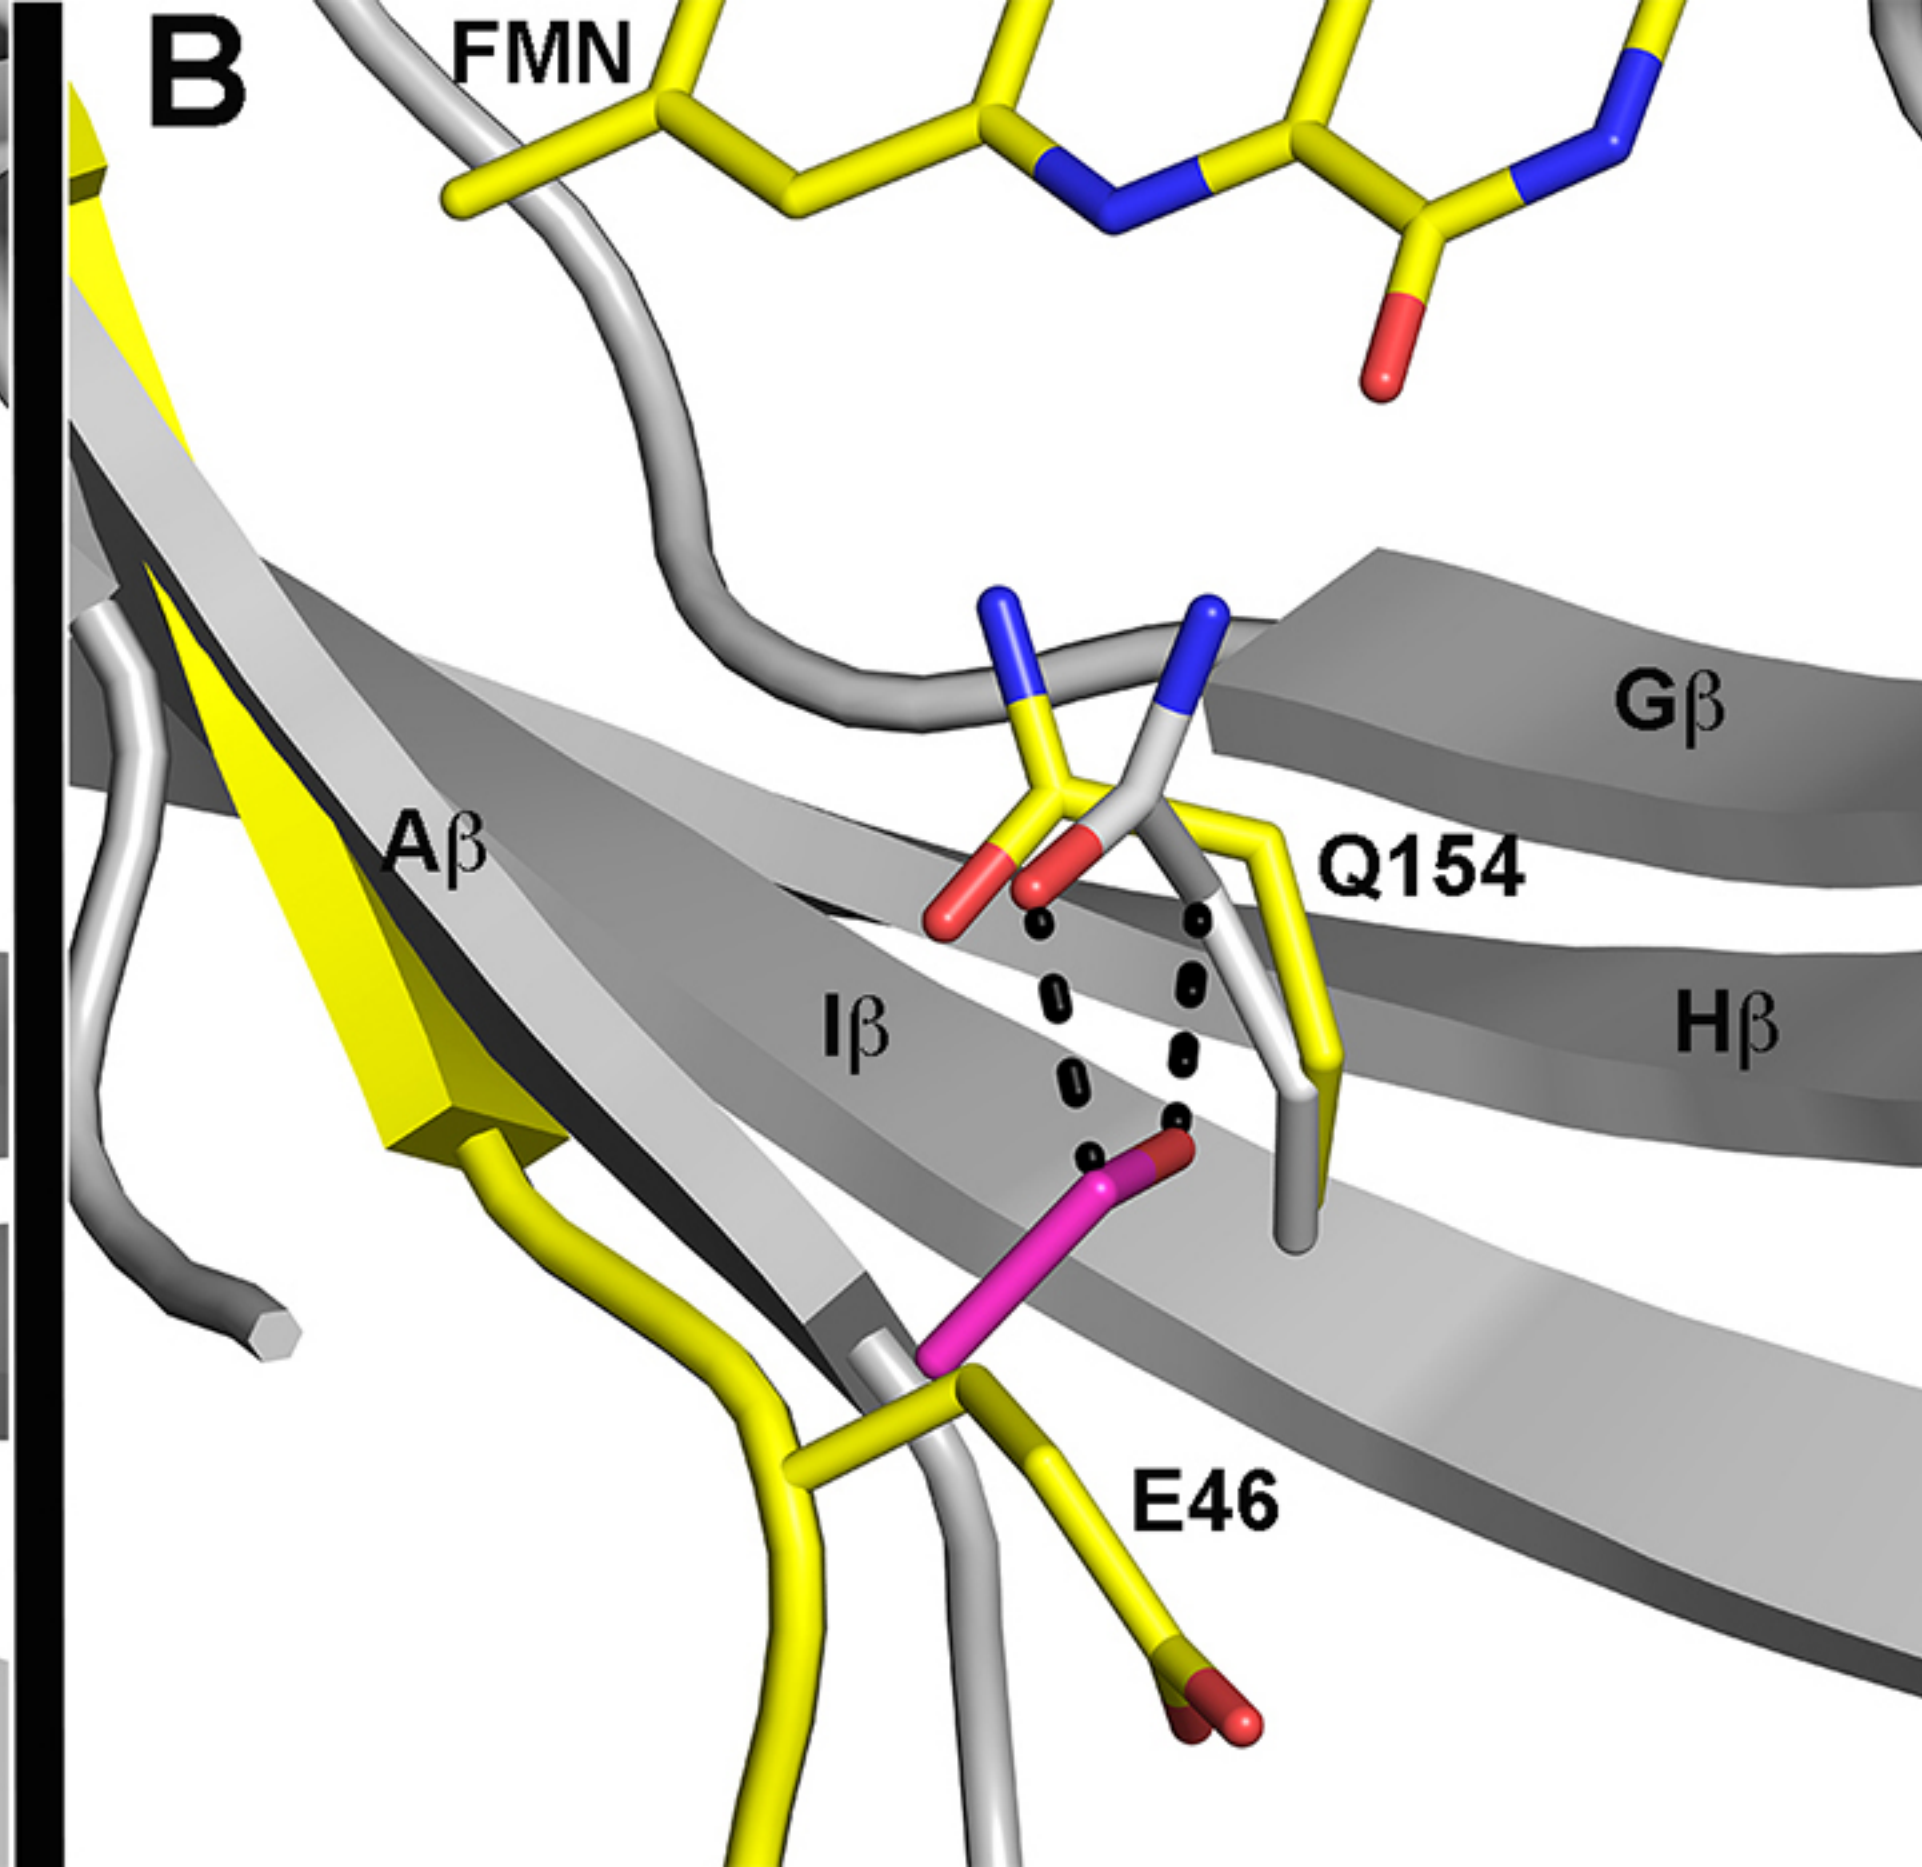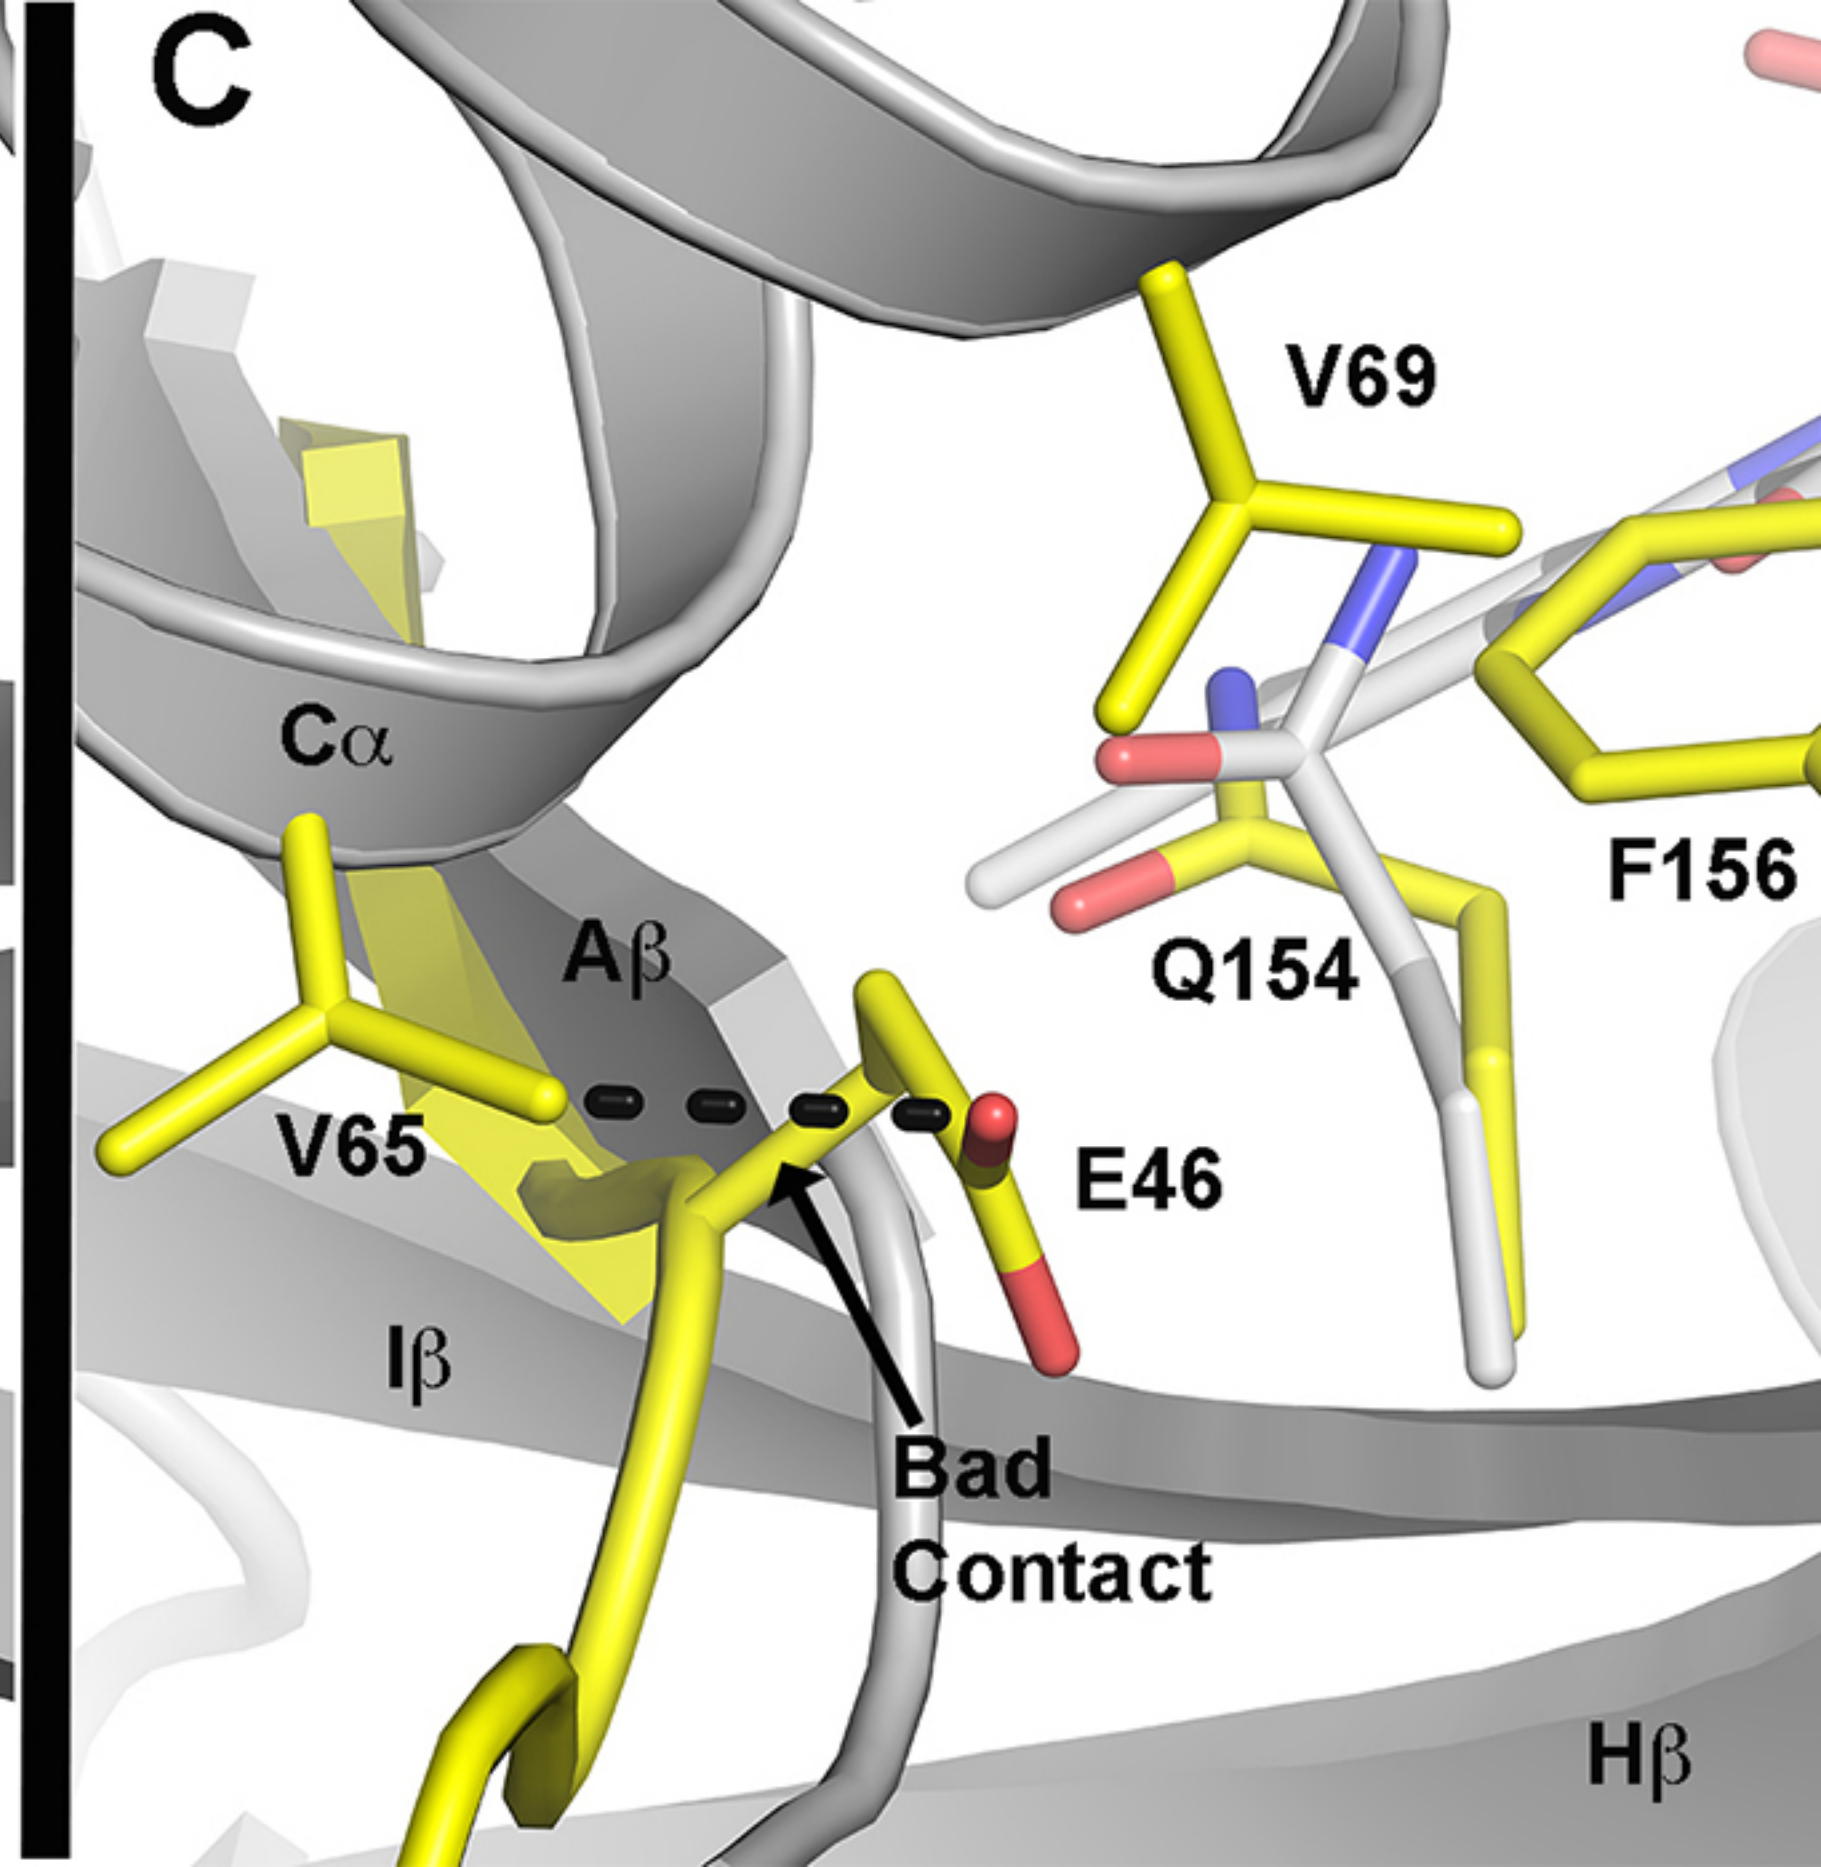

Supplement: supp [file elife_poa_e21646_Figure_4_figure_supplement_2.pdf › elife_poa_e21646_Figure_4_figure_supplement_2.pdf]

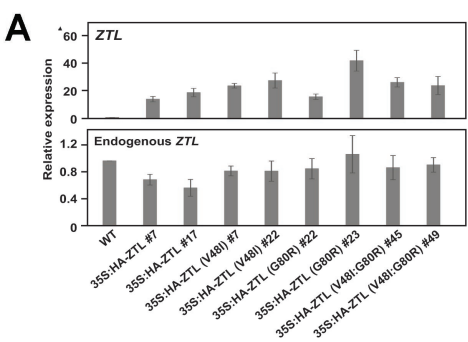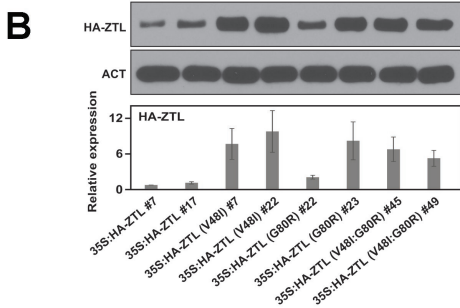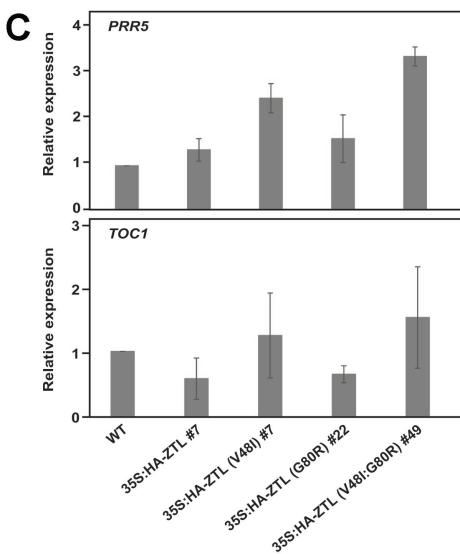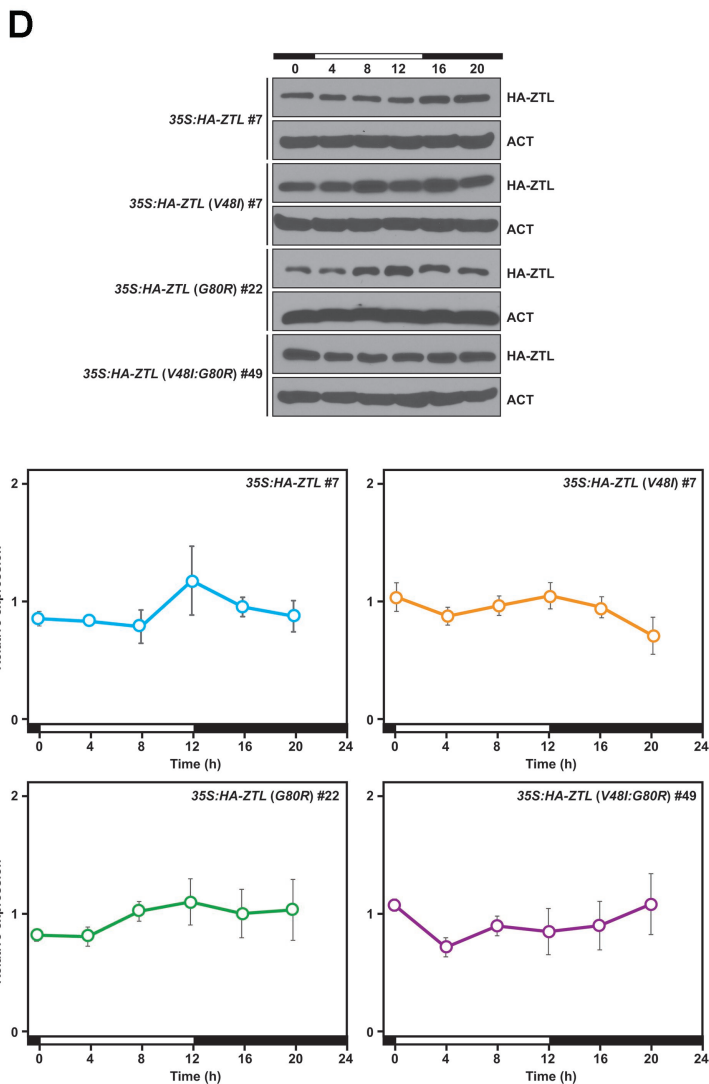

Supplement: supp [file elife_poa_e21646_Figure_5_figure_supplement_1.pdf › elife_poa_e21646_Figure_5_figure_supplement_1.pdf]

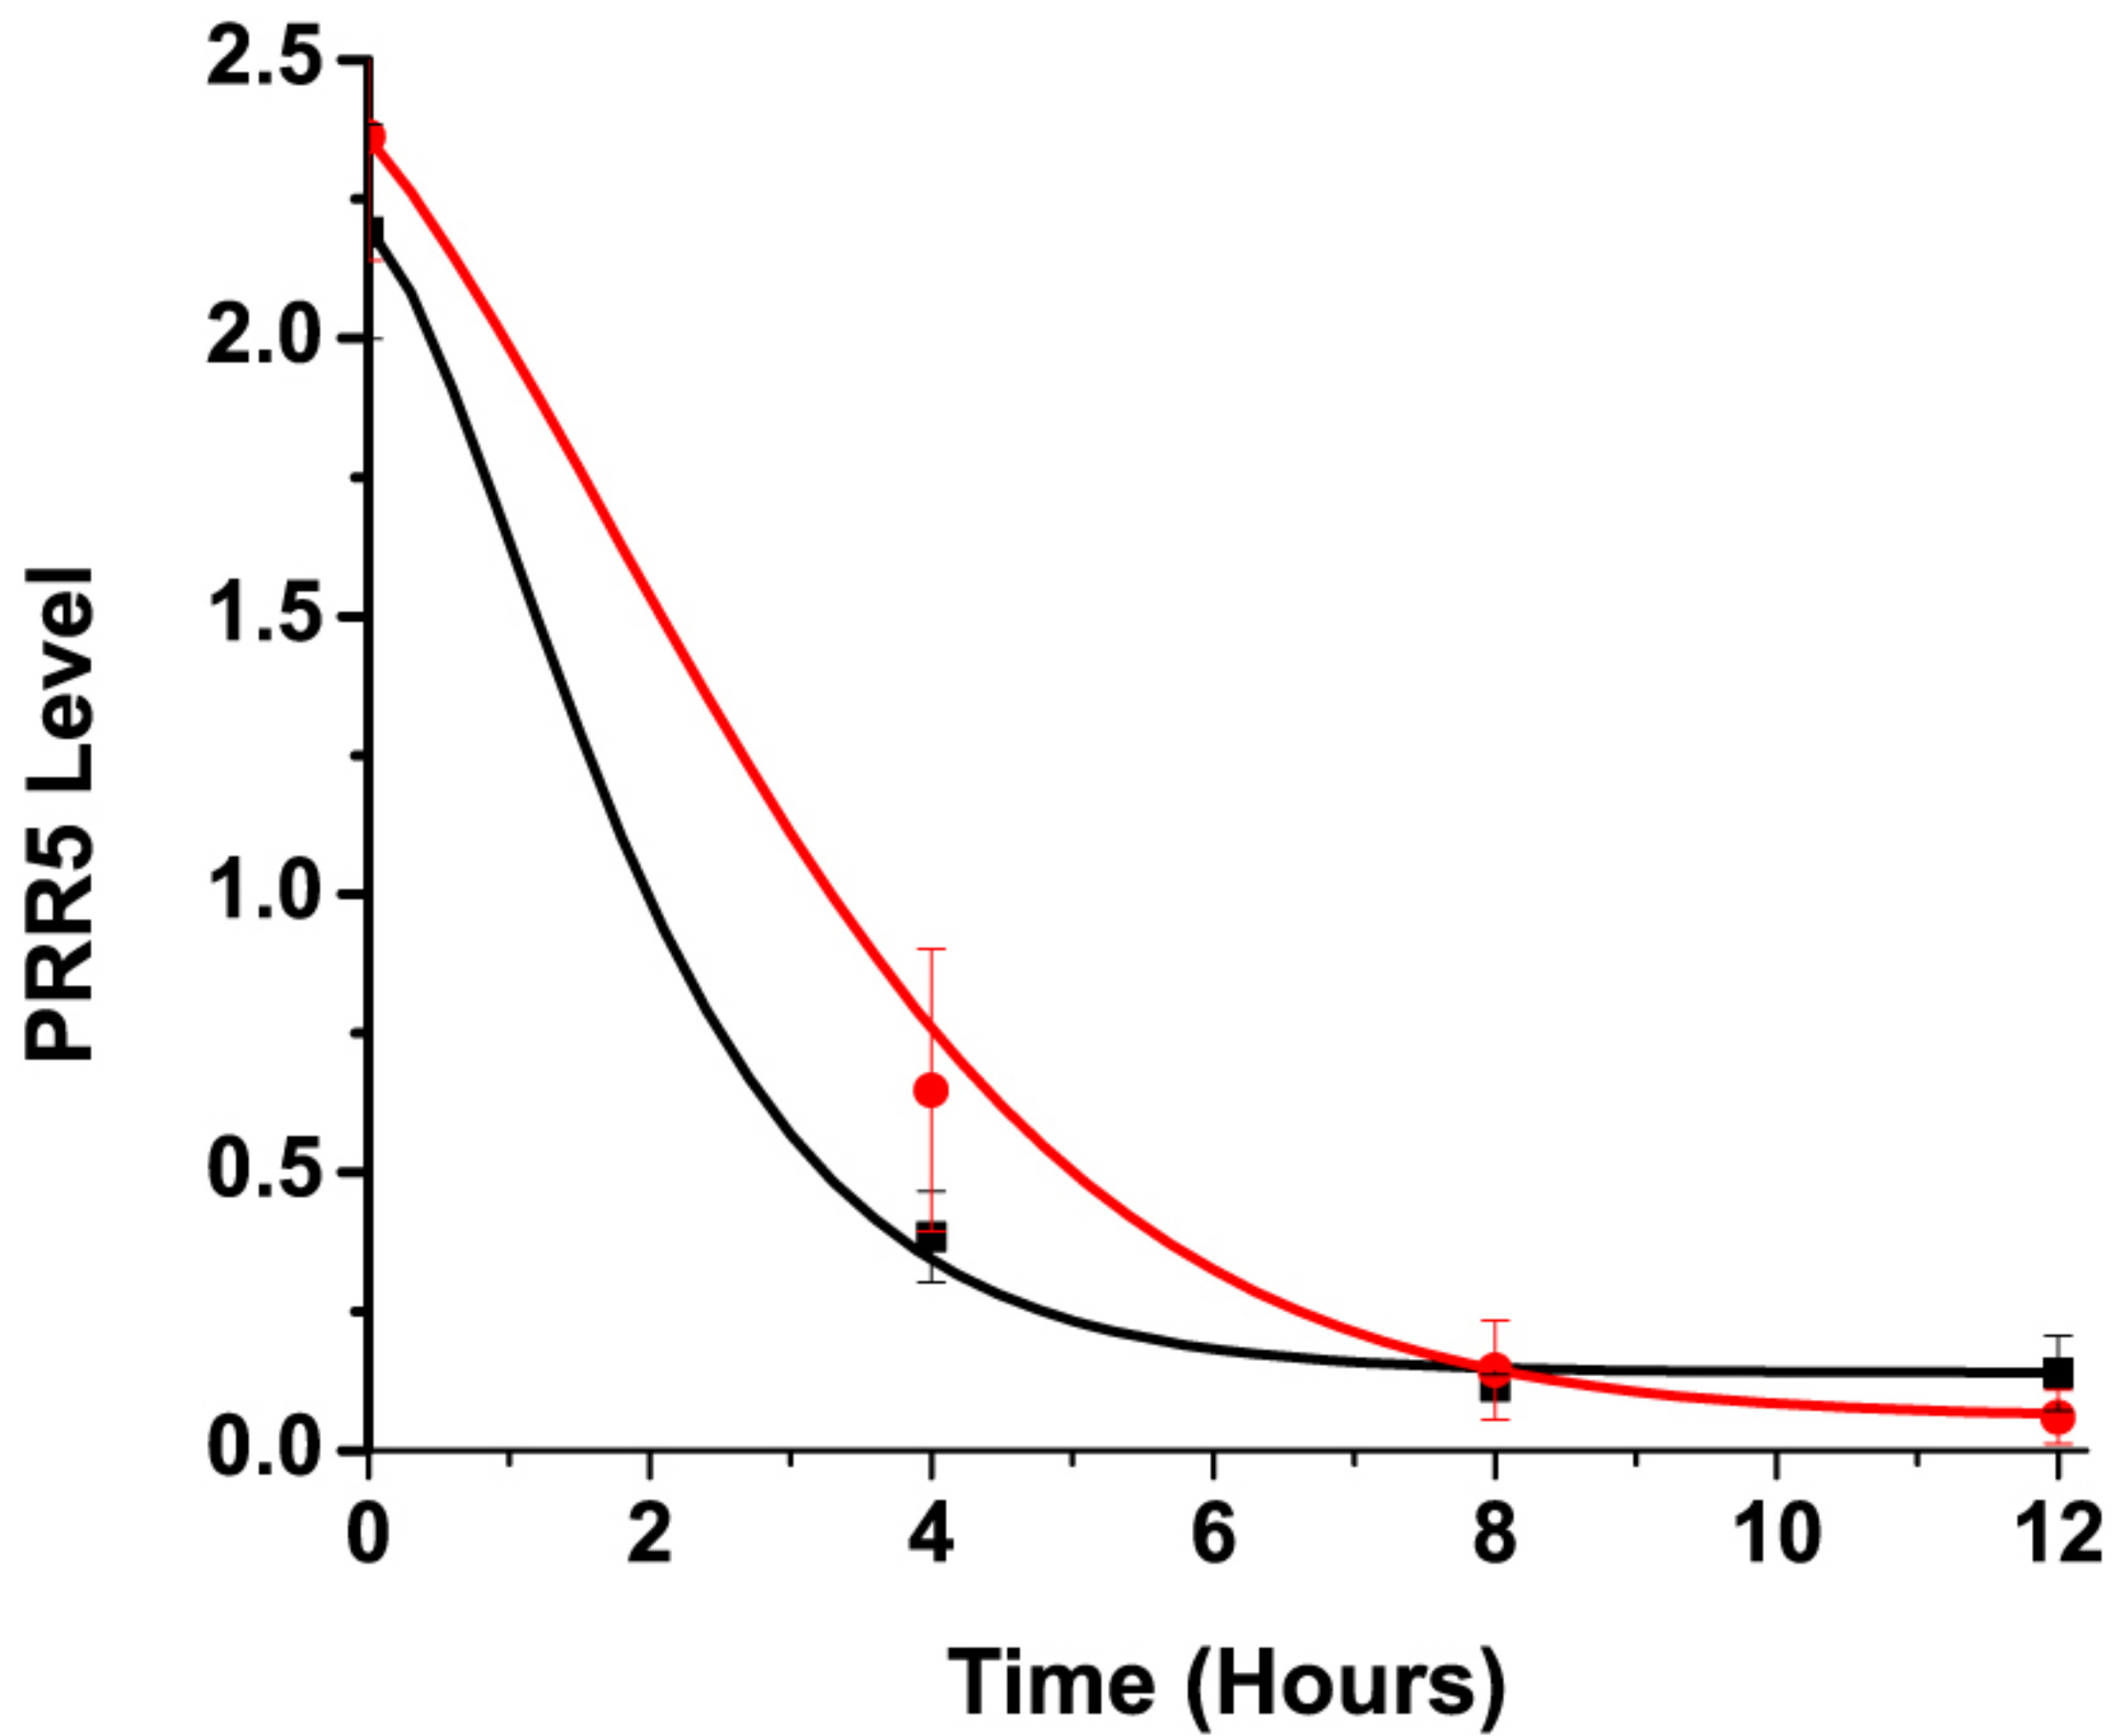

Supplement: supp [file elife_poa_e21646_Figure_5_figure_supplement_2.pdf › elife_poa_e21646_Figure_5_figure_supplement_2.pdf]
